# Supplementary material for: N-Acylsulfonamide: a valuable moiety to design new sulfa drug analogues
Source: Royal Society of Chemistry journal article supplement (doi:10.1039/d3md00229b), 2023-01-01
Supplement: d3md00229b1.pdf [file d3md00229b1.pdf]

# Supporting information

## ***N*-acylsulfonamide: a valuable moiety to design new sulfa drug analogues**

Romain Amador,<sup>a</sup> Ali Tahrioui,<sup>b</sup> Magalie Barreau,<sup>b</sup> Olivier Lesouhaitier,<sup>b</sup> Michael Smietana<sup>\*a</sup>  
and Guillaume Clavé<sup>\*a</sup>

<sup>a</sup> *Institut des Biomolécules Max Mousseron, Université de Montpellier, CNRS, ENSCM, 1919 route de Mende, 34095 Montpellier, France.*

<sup>b</sup> *Unité de Recherche Communication Bactérienne et Stratégies Anti-infectieuses (CBSA), UR4312, Université de Rouen Normandie, Normandie Université, Évreux 27000, France*

E-mail: [guillaume.clave@cnrs.fr](mailto:guillaume.clave@cnrs.fr) ; [michael.smietana@umontpellier.fr](mailto:michael.smietana@umontpellier.fr)

## Table of contents

|                                                                                            |    |
|--------------------------------------------------------------------------------------------|----|
| General .....                                                                              | 3  |
| Chemical synthesis.....                                                                    | 4  |
| Synthesis of 4-aminobenzenesulfonyl azide 2 .....                                          | 4  |
| Synthesis of triethylammonium thioacetate derivatives .....                                | 6  |
| Triethylammonium 3-methoxybenzothioate (3a) .....                                          | 6  |
| Triethylammonium 2-methoxybenzothioate (3b) .....                                          | 8  |
| Triethylammonium 4-nitrobenzothioate (3c) .....                                            | 10 |
| Triethylammonium 3-Methoxy-4-nitrobenzothioate (3d) .....                                  | 12 |
| Triethylammonium 4-(trifluoromethyl)benzothioate (3e) .....                                | 14 |
| Triethylammonium 3,4,5-trifluorobenzothioate (3f) .....                                    | 16 |
| Triethylammonium 2,4-dichlorobenzothioate (3g) .....                                       | 18 |
| Synthesis of sulfadrag analogues.....                                                      | 20 |
| Triethylammonium ((4-acetamidophenyl)sulfonyl)(3-methoxybenzoyl)amide (4a) .....           | 20 |
| Triethylammonium ((4-acetamidophenyl)sulfonyl)(2-methoxybenzoyl)amide (4b) .....           | 22 |
| Triethylammonium ((4-aminophenyl)sulfonyl)(4-nitrobenzoyl)amide (4c) .....                 | 24 |
| Triethylammonium ((4-aminophenyl)sulfonyl)(3-methoxy-4-nitrobenzoyl)amide (4d) .....       | 26 |
| Triethylammonium ((4-acetamidophenyl)sulfonyl)(4-(trifluoromethyl)benzoyl)amide (4e) ..... | 28 |
| Triethylammonium ((4-acetamidophenyl)sulfonyl)(3,4,5-trifluorobenzoyl)amide (4f) .....     | 30 |
| Triethylammonium ((4-acetamidophenyl)sulfonyl)(2,4-dichlorobenzoyl)amide (4g) .....        | 32 |
| <i>N</i> -((4-acetamidophenyl)sulfonyl)benzamide (4h) .....                                | 34 |
| <i>N</i> -((4-acetamidophenyl)sulfonyl)acetamide (4i) .....                                | 36 |
| <i>N</i> -((4-aminophenyl)sulfonyl)-3-methoxybenzamide (5a) .....                          | 38 |
| <i>N</i> -((4-aminophenyl)sulfonyl)-2-methoxybenzamide (5b) .....                          | 40 |
| <i>N</i> -((4-aminophenyl)sulfonyl)-4-nitrobenzamide (5c) .....                            | 42 |
| <i>N</i> -((4-aminophenyl)sulfonyl)-3-methoxy-4-nitrobenzamide (5d) .....                  | 44 |
| <i>N</i> -((4-aminophenyl)sulfonyl)-4-(trifluoromethyl)benzamide (5e) .....                | 46 |
| <i>N</i> -((4-aminophenyl)sulfonyl)-3,4,5-trifluorobenzamide (5f) .....                    | 48 |
| <i>N</i> -((4-aminophenyl)sulfonyl)-2,4-dichlorobenzamide (5g) .....                       | 50 |
| <i>N</i> -((4-aminophenyl)sulfonyl)benzamide (5h) .....                                    | 52 |
| <i>N</i> -((4-aminophenyl)sulfonyl)acetamide (5i) .....                                    | 54 |
| Antibacterial and antibiofilm activities of <i>N</i> -acylsulfonamide analogues.....       | 56 |
| Determination of minimum inhibitory concentration (MIC) .....                              | 56 |
| Biofilm quantification using a crystal violet assay .....                                  | 56 |
| Statistical Analyses.....                                                                  | 57 |
| Cytotoxicity assays .....                                                                  | 57 |

## **General**

All dry solvents and reagents were purchased from commercial suppliers and were used without further purification. Thin-layer chromatography (TLC) analyses were carried out on 60 F-254 aluminium sheets. Purifications by column chromatography were performed using Biotage Isolera 1 system with Column Flash Pure from Büchi. NMR experiments were recorded on Bruker 400, 500 or 600 spectrometers at 20°C. Chemical shifts are expressed in parts per million (ppm) relative to the residual solvent signal: CD<sub>3</sub>CN ( $\delta_{\text{H}} = 1.96$ ,  $\delta_{\text{C}} = 1.79$  (CH<sub>3</sub>), 118.26 (CN)), CDCl<sub>3</sub> ( $\delta_{\text{H}} = 7.26$ ,  $\delta_{\text{C}} = 77.36$ ), CD<sub>3</sub>OD ( $\delta_{\text{H}} = 3.31$ ,  $\delta_{\text{C}} = 49.00$  (CH<sub>3</sub>), DMSO ( $\delta_{\text{H}} = 2.5$ ,  $\delta_{\text{C}} = 39.52$ ) or D<sub>2</sub>O ( $\delta_{\text{H}} = 4.79$ ).<sup>1</sup> *J* values are in Hz. HRMS analyses were obtained with electrospray ionization (ESI) in positive or negative mode on a Q-TOF Micromass spectrometer. Analytical RP-HPLC was performed on a UHPLC ThermoScientific Ultimate3000 system equipped with a LPG-3400RS pump, a DAD 3000 detector and an WPS-3000TBRS Autosampler, Column Oven TCC-3000SD. Buffers and aqueous mobile-phases for RP-HPLC were prepared using water purified with a Milli-Q system (purified to 18.2 M $\Omega$ .cm).

**RP-HPLC analysis:** System A: RP-HPLC (Accucore™ C18 aQ column, 2.6  $\mu\text{m}$ , 4.6 $\times$ 50 mm) with CH<sub>3</sub>CN and 0.1% aqueous trifluoroacetic acid (aq. TFA, 0.1%, v/v, pH 2.0) as the eluents [0% CH<sub>3</sub>CN (2 min), followed by linear gradient from 0 to 100% (25 min) of CH<sub>3</sub>CN] at a flow rate of 1 mL.min<sup>-1</sup>. Triple UV detection was achieved at 210, 260 and 650 nm. System B: System A with CH<sub>3</sub>CN and aqueous triethylammonium acetate (aq. TEAA, 50 mM, pH 7.0) as the eluents.

***The purity of the final compounds was determined by RP-HPLC analysis with detection at 260 nm.***

## Chemical synthesis

### Synthesis of 4-aminobenzenesulfonyl azide **2**

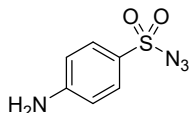

A modified version of a protocol previously describes was used to isolate the product as an hydrochloride salt.<sup>2</sup>

4-acetamidobenzenesulfonyl azide **1** (1.2 g, 5 mmol) was suspended in conc. aq. HCl (5 mL) and the resulting mixture was stirred at 90°C for 30 min. Thereafter, the mixture was diluted with THF (150 mL) and evaporated to dryness. The resulting residue was taken up in toluene and evaporated to dryness (2 x 50 mL). The resulting white hydrochloride salt was dissolved in H<sub>2</sub>O and lyophilized giving the 4-aminobenzenesulfonyl azide **2** (1.15 g, 4.91 mmol, quant.) as a white amorphous powder. <sup>1</sup>H NMR (400 MHz, D<sub>2</sub>O): δ = 7.50-7.55 (m, 2H), 8.04-8.08 (m, 2H) ppm. <sup>13</sup>C NMR (100 MHz, D<sub>2</sub>O): δ = 122.4, 123.8, 127.4, 129.7 ppm.

# <sup>1</sup>H and <sup>13</sup>C NMR Spectra (D<sub>2</sub>O)

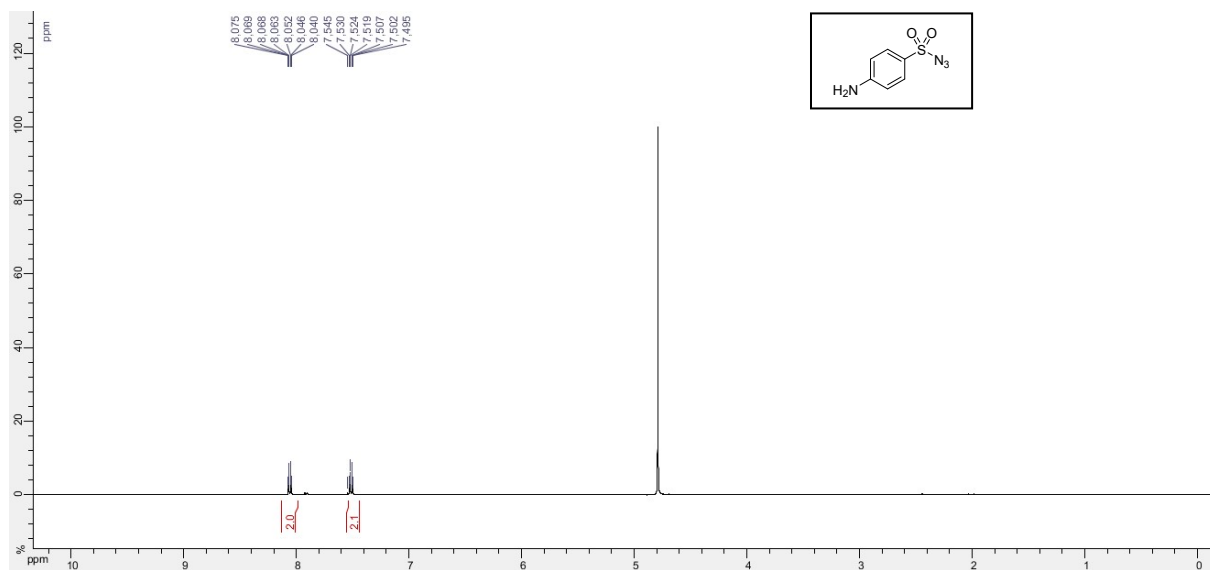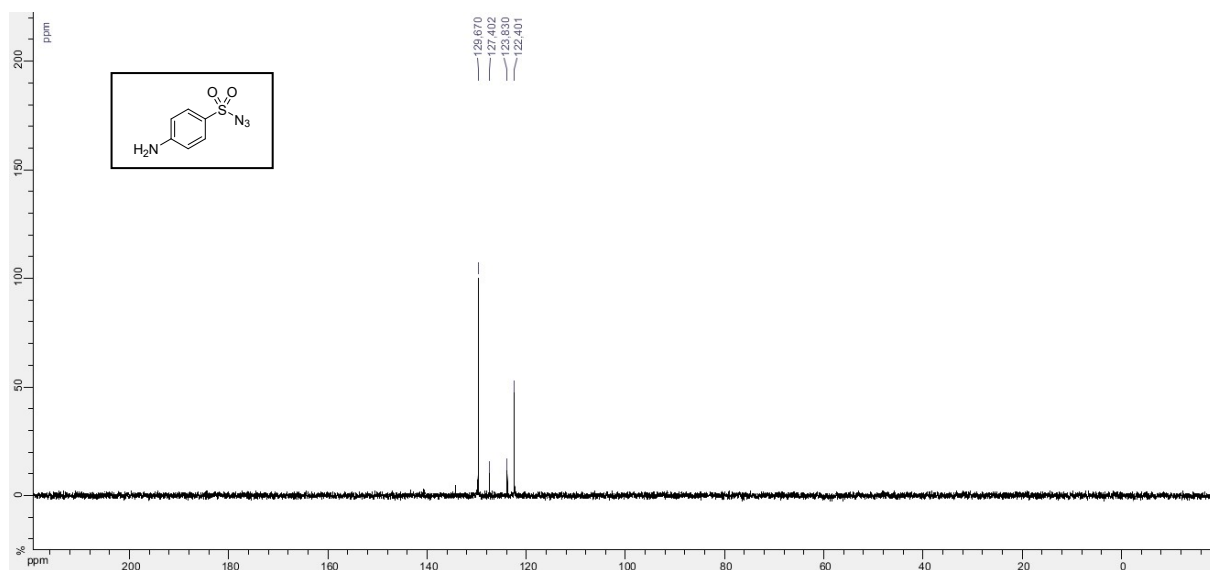

## Synthesis of triethylammonium thioacetate derivatives

### Triethylammonium 3-methoxybenzothioate (**3a**)

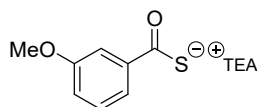

3-methoxybenzoic acid (228 mg, 1.5 mmol) was dissolved in dry DMF (6 mL). Thereafter, potassium thioacetate (513 mg, 4.5 mmol) and acetyl sulfide (30  $\mu$ L, 300  $\mu$ mol) were sequentially added. The resulting mixture was stirred at room temperature for 4 h. The reaction was checked for completion by RP-HPLC (system B, conversion about 80%). Thereafter, aq. 50 mM TEAA (pH 7.0, 54 mL) was added and the resulting mixture was purified by RP-chromatography with a linear gradient of MeCN (0-20%) in aq. 50 mM TEAA as the mobile phase, giving the triethylammonium 3-methoxybenzothioate **3a** as a yellow amorphous powder after lyophilization (210 mg, 780  $\mu$ mol, 65% after recovery of starting material).  $^1\text{H}$  NMR (400 MHz, MeOD):  $\delta$  = 1.30 (t,  $J$  = 7.3 Hz, 9H), 3.21 (q,  $J$  = 7.3 Hz, 6H), 3.82 (s, 3H), 6.94-6.97 (m, 1H), 7.22 (t,  $J$  = 7.8 Hz, 1H), 7.67-7.70 (m, 2H), ppm.  $^{13}\text{C}$  NMR (100 MHz, MeOD):  $\delta$  = 9.1, 47.7, 55.7, 114.3, 117.4, 121.7, 129.2, 147.2, 160.4, 214.4 ppm. HRMS (ESI)  $m/z$ :  $[\text{M-H}]^-$  Calcd for  $\text{C}_8\text{H}_7\text{O}_2\text{S}$ : 167,0172; found 167.0198.

# <sup>1</sup>H and <sup>13</sup>C NMR Spectra (MeOD)

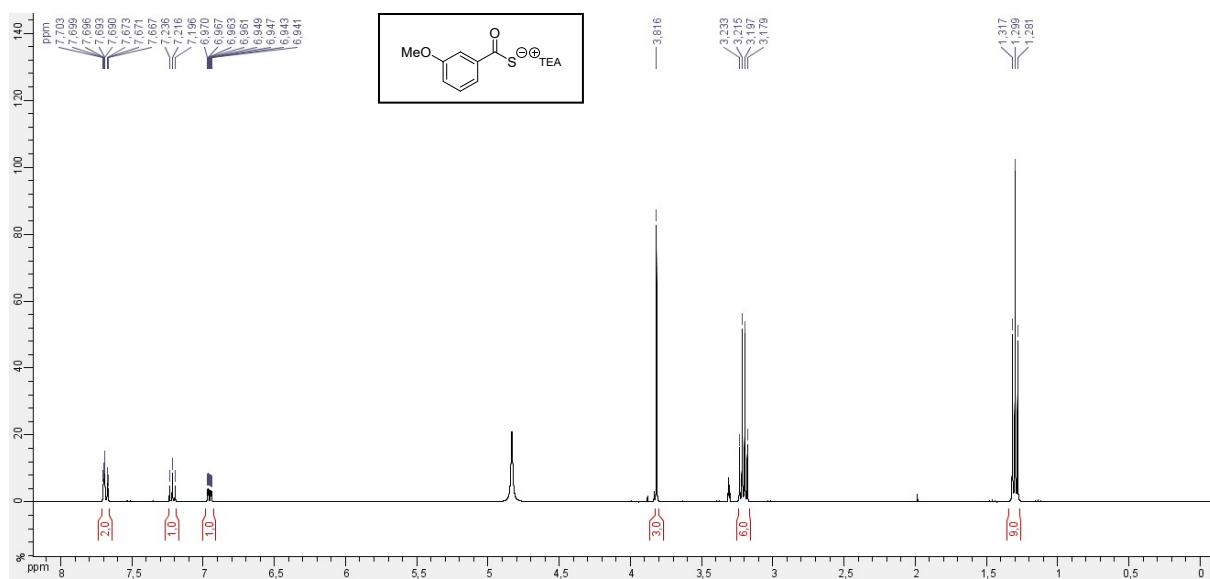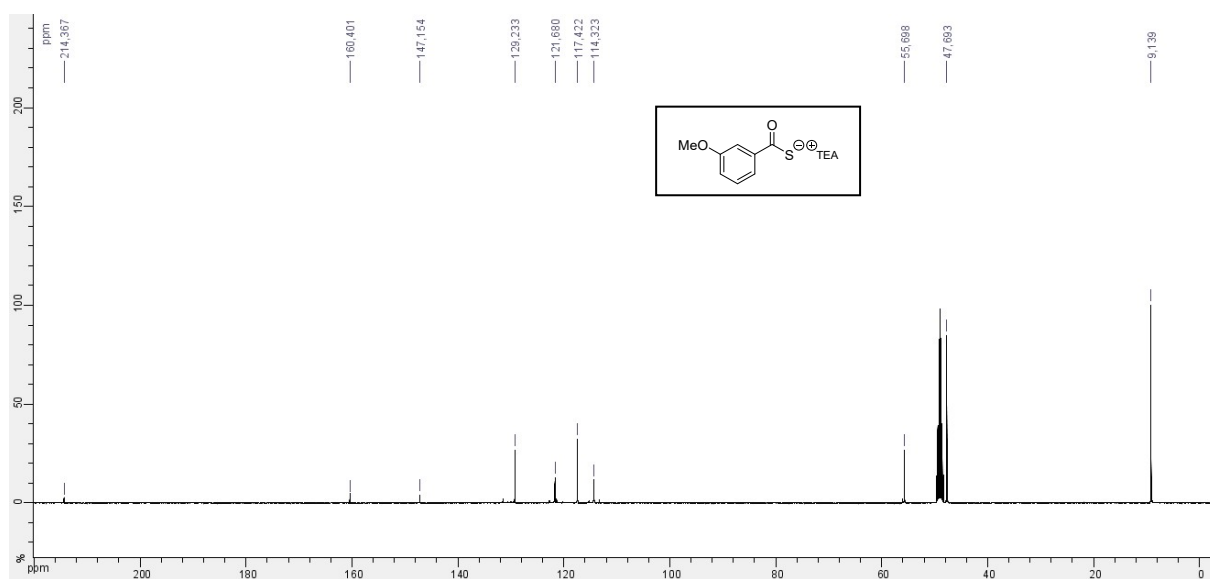

### Triethylammonium 2-methoxybenzothioate (**3b**)

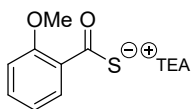

2-methoxybenzoic acid (228 mg, 1.5 mmol) was dissolved in dry DMF (6 mL). Thereafter, potassium thioacetate (513 mg, 4.5 mmol) and acetyl sulfide (30  $\mu$ L, 300  $\mu$ mol) were sequentially added. The resulting mixture was stirred at room temperature for 4 h. The reaction was checked for completion by RP-HPLC (system B, conversion about 65%). Thereafter, aq. 50 mM TEAA (pH 7.0, 54 mL) was added and the resulting mixture was purified by RP-chromatography with a linear gradient of MeCN (0-20%) in aq. 50 mM TEAA as the mobile phase, giving the triethylammonium 2-methoxybenzothioate **3b** as a yellow amorphous powder after lyophilization (182 mg, 677  $\mu$ mol, 69% after recovery of starting material).  $^1\text{H}$  NMR (400 MHz, MeOD):  $\delta$  = 1.30 (t,  $J$  = 7.3 Hz, 9H), 3.20 (q,  $J$  = 7.3 Hz, 6H), 3.79 (s, 3H), 6.84-7.48 (m, 4H) ppm.  $^{13}\text{C}$  NMR (100 MHz, MeOD):  $\delta$  = 9.2, 47.7, 56.0, 112.5, 120.8, 129.2, 130.0, 139.9, 155.4, 217.3 ppm. HRMS (ESI)  $m/z$ :  $[\text{M-H}]^-$  Calcd for  $\text{C}_8\text{H}_7\text{O}_2\text{S}$ : 167,0172; found 167.0197.



# <sup>1</sup>H and <sup>13</sup>C NMR Spectra (MeOD)

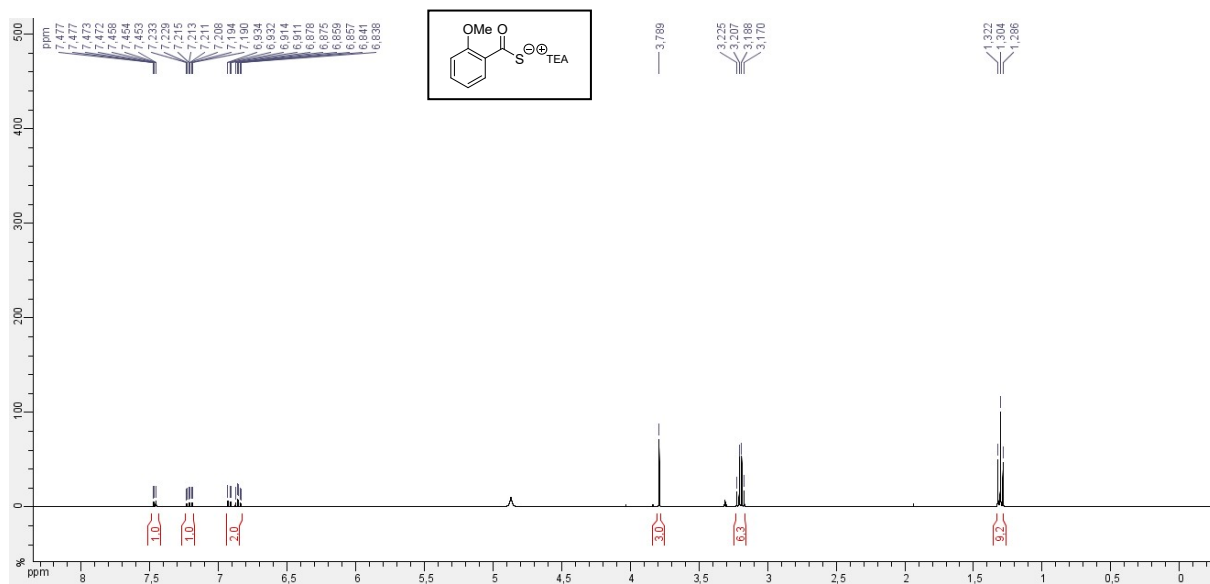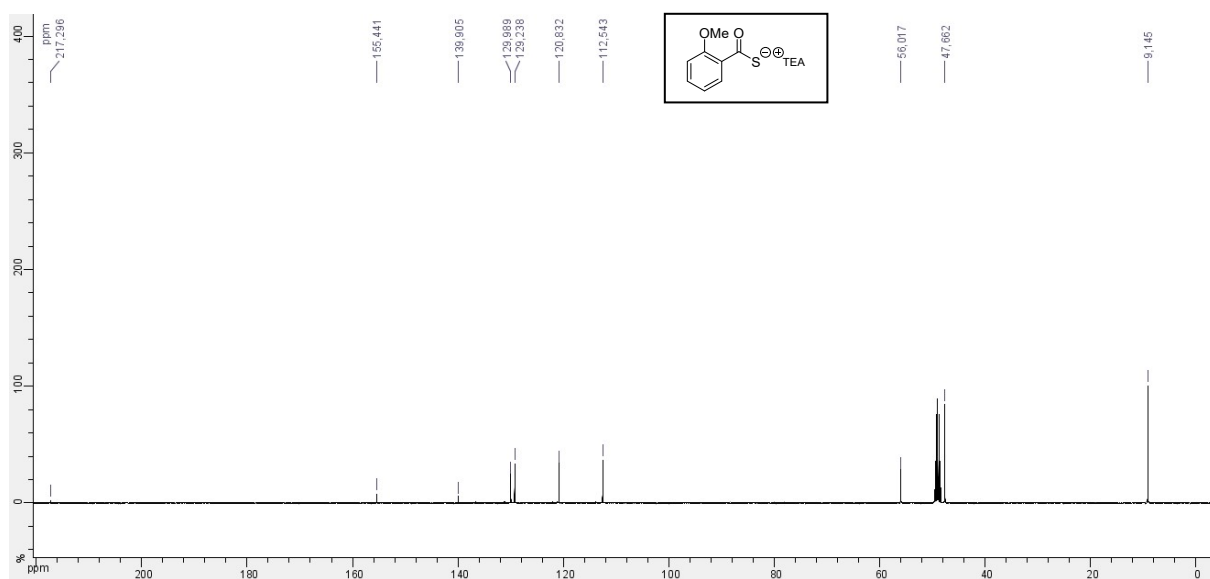

### Triethylammonium 4-nitrobenzothioate (**3c**)

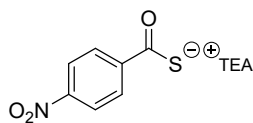

4-nitrobenzoic acid (84 mg, 500  $\mu\text{mol}$ ) was dissolved in dry DMF (3 mL). Thereafter, potassium thioacetate (171 mg, 1.5 mmol) and acetyl sulfide (10  $\mu\text{L}$ , 100  $\mu\text{mol}$ ) were sequentially added. The resulting mixture was stirred at room temperature for 4 h. The reaction was checked for completion by RP-HPLC (system B, conversion about 61%). Thereafter, aq. 50 mM TEAA (pH 7.0, 28 mL) was added and the resulting mixture was purified by RP-chromatography with a linear gradient of MeCN (0-30%) in aq. 50 mM TEAA as the mobile phase, giving the triethylammonium 4-nitrobenzothioate **3c** as a red amorphous powder after lyophilization (80 mg, 281  $\mu\text{mol}$ , 94% after recovery of starting material). Noteworthy, the product is likely to degrade at RT in solution preventing the obtaining of clean spectra.  $^1\text{H}$  NMR (500 MHz, MeOD):  $\delta$  = 1.31 (t,  $J$  = 7.3 Hz, 9H), 3.23 (q,  $J$  = 7.3 Hz, 6H), 3.99 (s, 3H), 8.13-8.25 (m, 4H) ppm.  $^{13}\text{C}$  NMR (125 MHz, MeOD):  $\delta$  = 9.2, 47.7, 123.6, 124.1, 129.8, 131.3, 149.9, 150.8, 212.0 ppm. HRMS (ESI)  $m/z$ :  $[\text{M}-\text{H}]^-$  Calcd for  $\text{C}_7\text{H}_4\text{NO}_3\text{S}$ : 181.9912; found 181.9916.

# <sup>1</sup>H and <sup>13</sup>C NMR Spectra (MeOD)

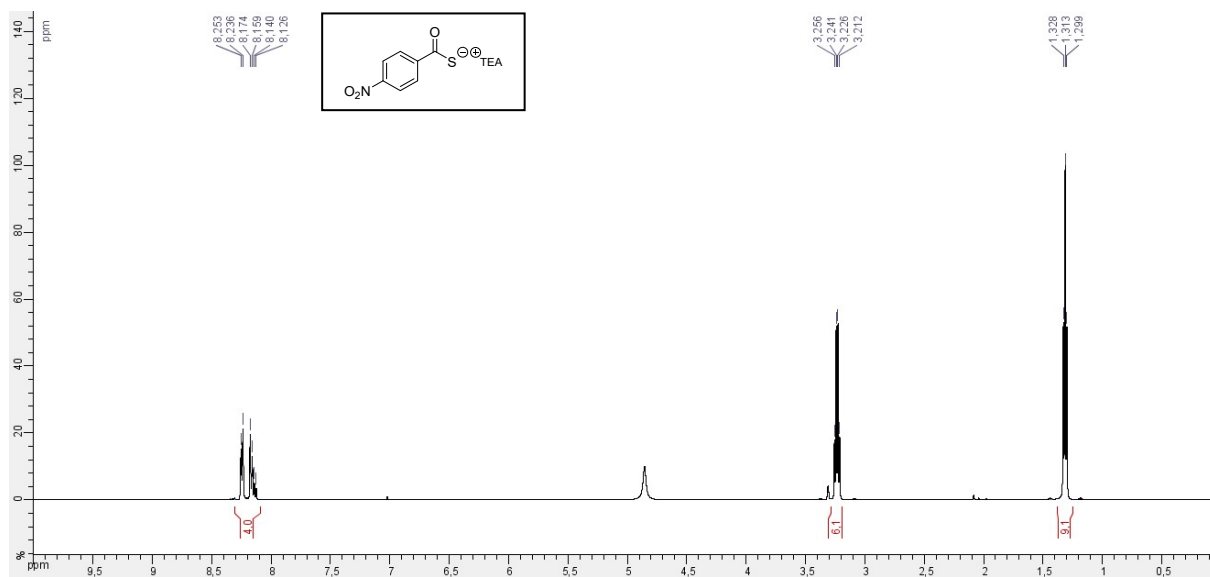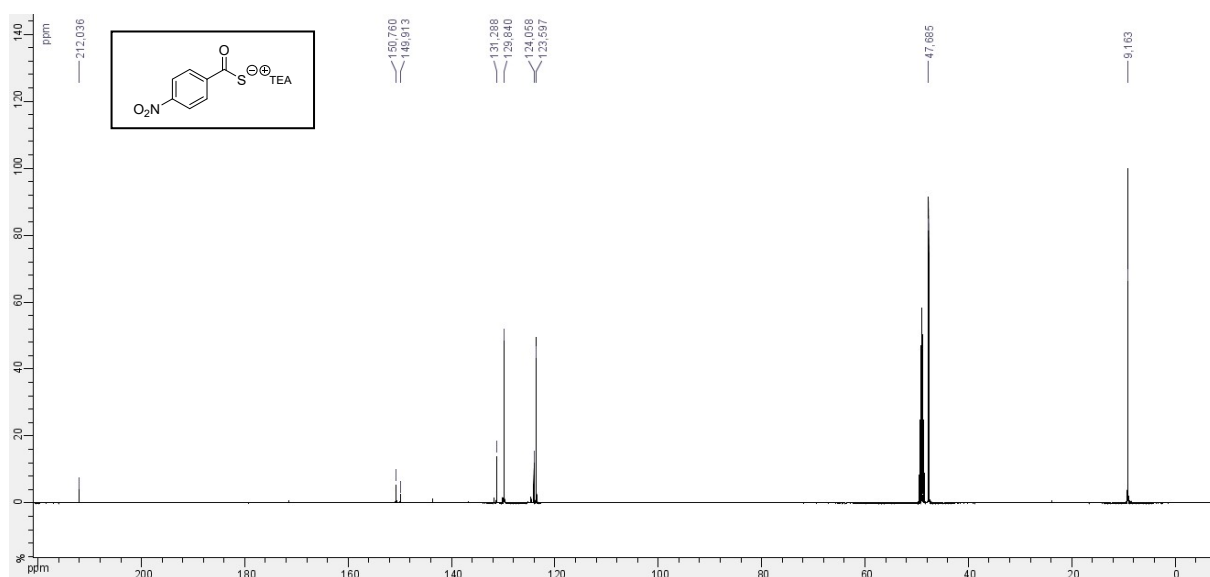

### Triethylammonium 3-Methoxy-4-nitrobenzothioate (**3d**)

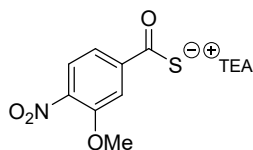

3-Methoxy-4-nitrobenzoic acid (100 mg, 500  $\mu$ mol) was dissolved in dry DMF (2 mL). Thereafter, potassium thioacetate (171 mg, 1.5 mmol) and acetyl sulfide (10  $\mu$ L, 100  $\mu$ mol) were sequentially added. The resulting mixture was stirred at room temperature for 4 h. The reaction was checked for completion by RP-HPLC (system B, conversion about 69%). Thereafter, aq. 50 mM TEAA (pH 7.0, 18 mL) was added and the resulting mixture was purified by RP-chromatography with a linear gradient of MeCN (0-30%) in aq. 50 mM TEAA as the mobile phase, giving the triethylammonium 3-Methoxy-4-nitrobenzothioate **3d** as a red amorphous powder after lyophilization (100 mg, 318  $\mu$ mol, 92% after recovery of starting material). Noteworthy, the product is likely to degrade at RT in solution preventing the obtaining of clean spectra.  $^1\text{H}$  NMR (400 MHz, MeOD):  $\delta$  = 1.31 (t,  $J$  = 7.3 Hz, 9H), 3.23 (q,  $J$  = 7.3 Hz, 6H), 3.99 (s, 3H), 7.74 (s, 2H), 7.99 (s, 1H) ppm.  $^{13}\text{C}$  NMR (100 MHz, MeOD):  $\delta$  = 9.2, 47.8, 57.0, 114.4, 120.8, 125.3, 141.8, 150.3, 153.1, 211.7 ppm. HRMS (ESI)  $m/z$ :  $[\text{M-H}]^-$  Calcd for  $\text{C}_8\text{H}_6\text{NO}_4\text{S}$ : 212.0018; found 212.0017.

# <sup>1</sup>H and <sup>13</sup>C NMR Spectra (MeOD)

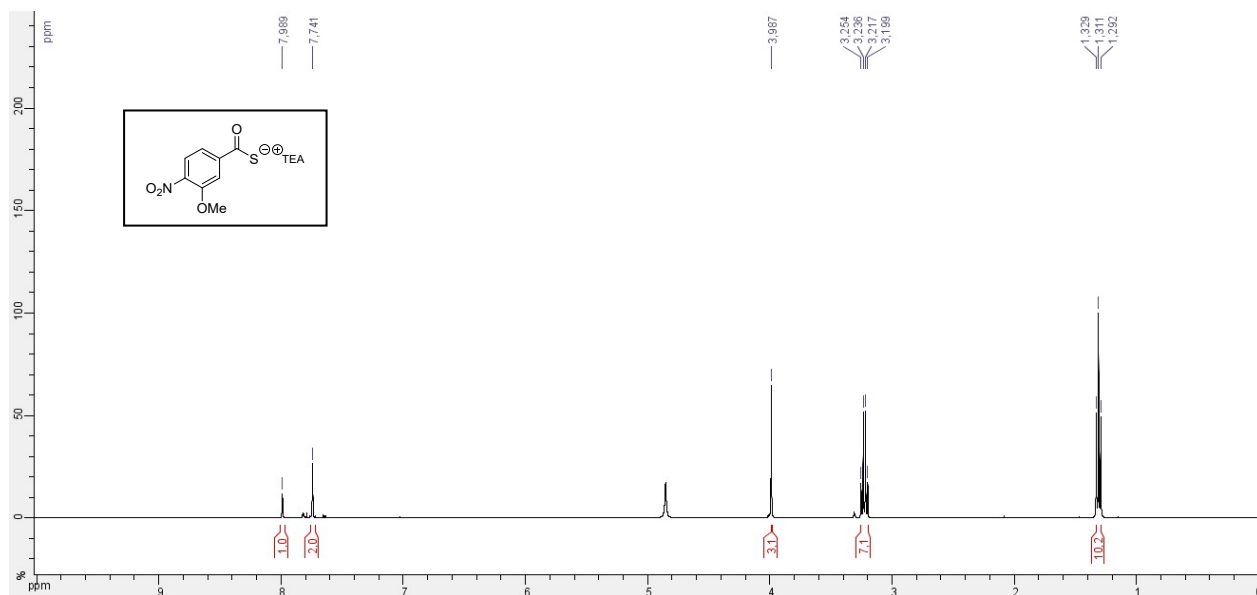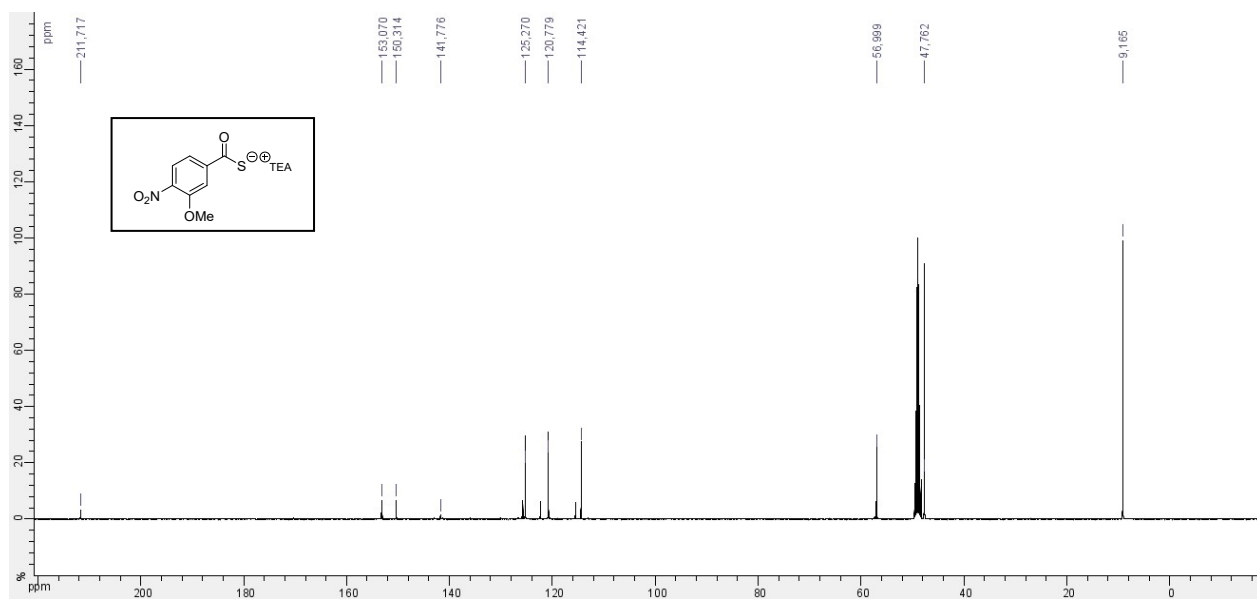

### Triethylammonium 4-(trifluoromethyl)benzoate (3e)

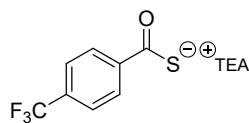

4-(trifluoromethyl)benzoic acid (285 mg, 1.5 mmol) was dissolved in dry DMF (6 mL). Thereafter, potassium thioacetate (513 mg, 4.5 mmol) and acetyl sulfide (30  $\mu$ L, 300  $\mu$ mol) were sequentially added. The resulting mixture was stirred at room temperature for 4 h. The reaction was checked for completion by RP-HPLC (system B, conversion about 85%). Thereafter, aq. 50 mM TEAA (pH 7.0, 54 mL) was added and the resulting mixture was purified by RP-chromatography with a linear gradient of MeCN (0-30%) in aq. 50 mM TEAA as the mobile phase, giving the triethylammonium 4-(trifluoromethyl)benzoate **3e** as a red amorphous powder after lyophilization (317 mg, 1.03 mmol, 81% after recovery of starting material).  $^1\text{H}$  NMR (400 MHz, MeOD):  $\delta$  = 1.31 (t,  $J$  = 7.3 Hz, 9H), 3.22 (q,  $J$  = 7.3 Hz, 6H), 7.60-8.24 (m, 4H) ppm.  $^{13}\text{C}$  NMR (100 MHz, MeOD):  $\delta$  = 9.2, 47.8, 125.3 (q,  $J_{\text{C-F}}$  = 3.7 Hz), 127.2 (q,  $J_{\text{C-F}}$  = 3.7 Hz), 149.0, 213.0 ppm. HRMS (ESI)  $m/z$ :  $[\text{M-H}]^-$  Calcd for  $\text{C}_8\text{H}_4\text{F}_3\text{OS}$ : 204.9940; found 204.9944.

# <sup>1</sup>H and <sup>13</sup>C NMR Spectra (MeOD)

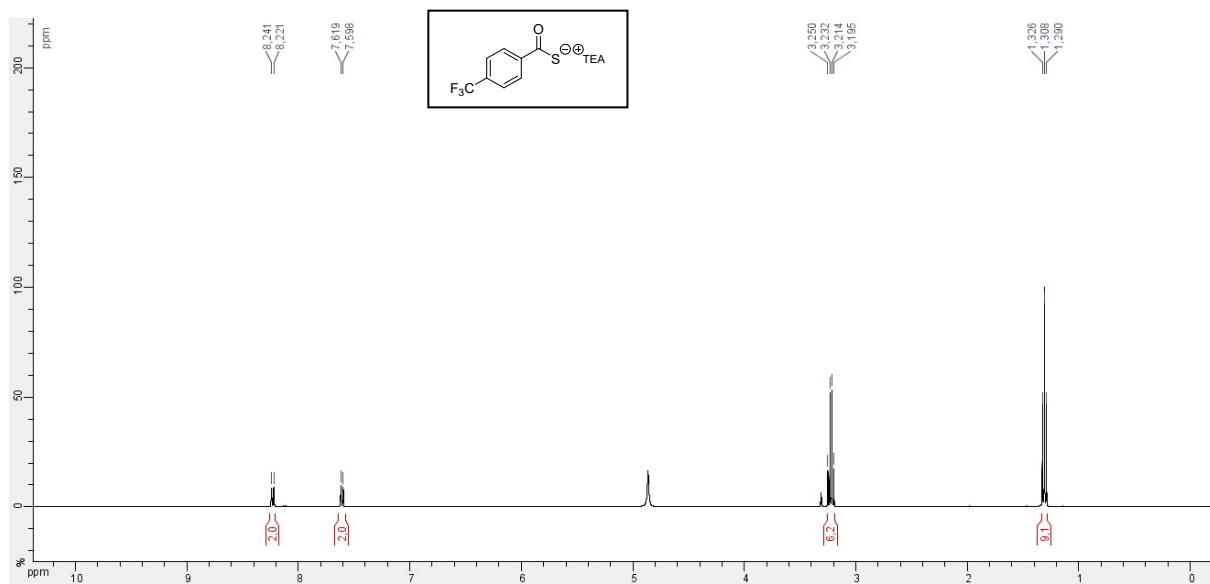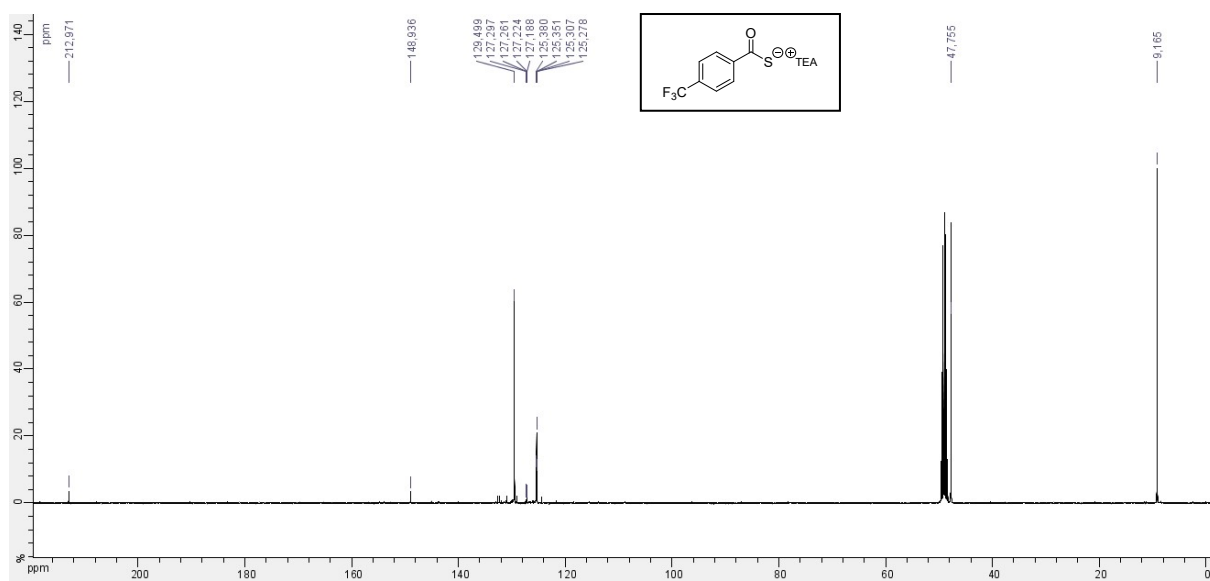

### Triethylammonium 3,4,5-trifluorobenzothioate (**3f**)

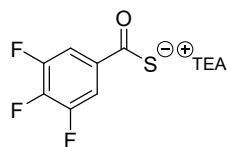

3,4,5-trifluorobenzoic acid (264 mg, 1.5 mmol) was dissolved in dry DMF (6 mL). Thereafter, potassium thioacetate (513 mg, 4.5 mmol) and acetyl sulfide (30  $\mu$ L, 300  $\mu$ mol) were sequentially added. The resulting mixture was stirred at room temperature for 4 h. The reaction was checked for completion by RP-HPLC (system B, conversion about 60%). Thereafter, aq. 50 mM TEAA (pH 7.0, 54 mL) was added and the resulting mixture was purified by RP-chromatography with a linear gradient of MeCN (0-30%) in aq. 50 mM TEAA as the mobile phase, giving the triethylammonium 3,4,5-trifluorobenzothioate **3f** as a red amorphous powder after lyophilization (160 mg, 641  $\mu$ mol, 71% after recovery of starting material).  $^1\text{H}$  NMR (500 MHz, MeOD):  $\delta$  = 1.31 (t,  $J$  = 7.3 Hz, 9H), 3.23 (q,  $J$  = 7.3 Hz, 6H), 7.85-7.89 (m, 2H) ppm.  $^{13}\text{C}$  NMR (125 MHz, MeOD):  $\delta$  = 9.2, 47.8, 113.2-113.4 (m), 141.3-141.8 (m), 143.3-143.5 (m), 150.1-150.2 (m), 152.1-152.2 (m), 209.1 ppm. HRMS (ESI)  $m/z$ :  $[\text{M-H}]^-$  Calcd for  $\text{C}_7\text{H}_2\text{F}_3\text{OS}$ : 190.9784; found 190.9793.



# <sup>1</sup>H and <sup>13</sup>C NMR Spectra (MeOD)

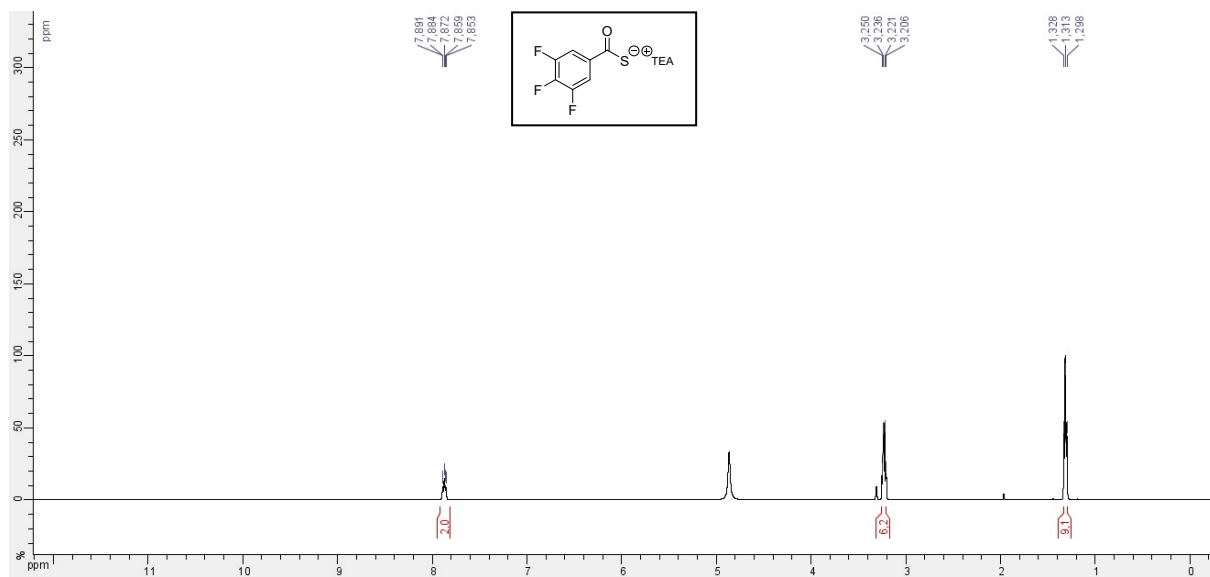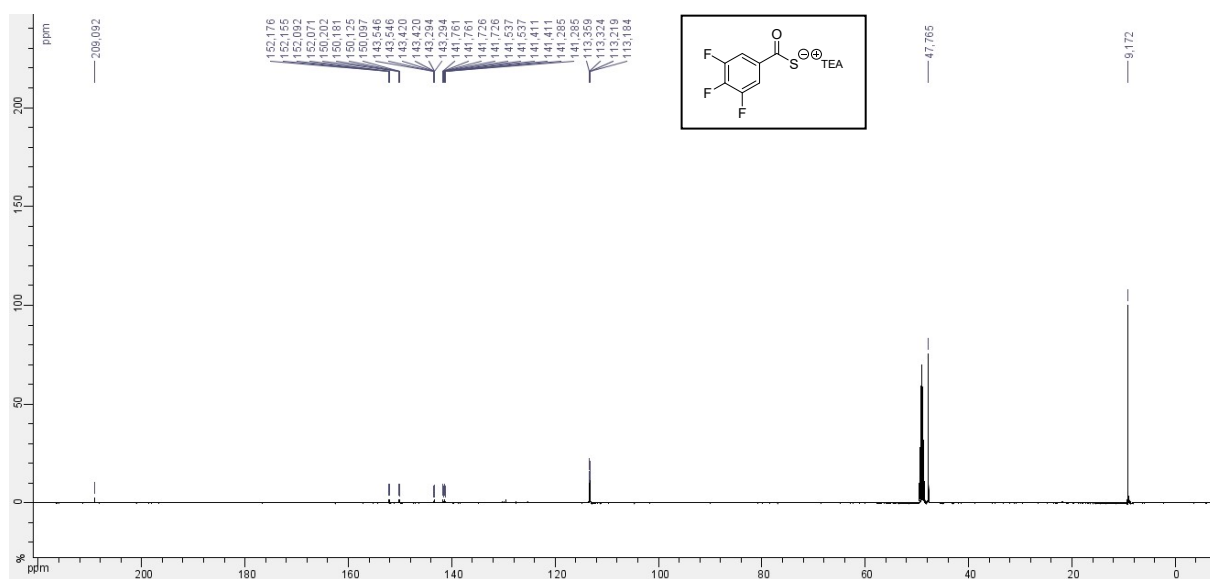

### Triethylammonium 2,4-dichlorobenzothioate (**3g**)

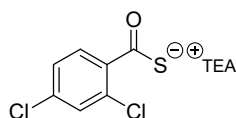

2,4-dichlorobenzoic acid (285 mg, 1.5 mmol) was dissolved in dry DMF (6 mL). Thereafter, potassium thioacetate (513 mg, 4.5 mmol) and acetyl sulfide (30  $\mu$ L, 300  $\mu$ mol) were sequentially added. The resulting mixture was stirred at room temperature for 4 h. The reaction was checked for completion by RP-HPLC (system B, conversion about 60%). Thereafter, aq. 50 mM TEAA (pH 7.0, 54 mL) was added and the resulting mixture was purified by RP-chromatography with a linear gradient of MeCN (0-30%) in aq. 50 mM TEAA as the mobile phase, giving the triethylammonium 2,4-dichlorobenzothioate **3g** as a red amorphous powder after lyophilization (215 mg, 702  $\mu$ mol, 78% after recovery of starting material).  $^1\text{H}$  NMR (400 MHz, MeOD):  $\delta$  = 1.32 (t,  $J$  = 7.3 Hz, 9H), 3.22 (q,  $J$  = 7.3 Hz, 6H), 7.22-7.49 (m, 3H) ppm.  $^{13}\text{C}$  NMR (100 MHz, MeOD):  $\delta$  = 9.2, 47.8, 127.5, 129.5, 129.9, 130.2, 134.0, 147.7, 214.5 ppm. HRMS (ESI)  $m/z$ :  $[\text{M-H}]^-$  Calcd for  $\text{C}_7\text{H}_3\text{OSCl}_2$ : 204.9282; found 204.9278.

# <sup>1</sup>H and <sup>13</sup>C NMR Spectra (MeOD)

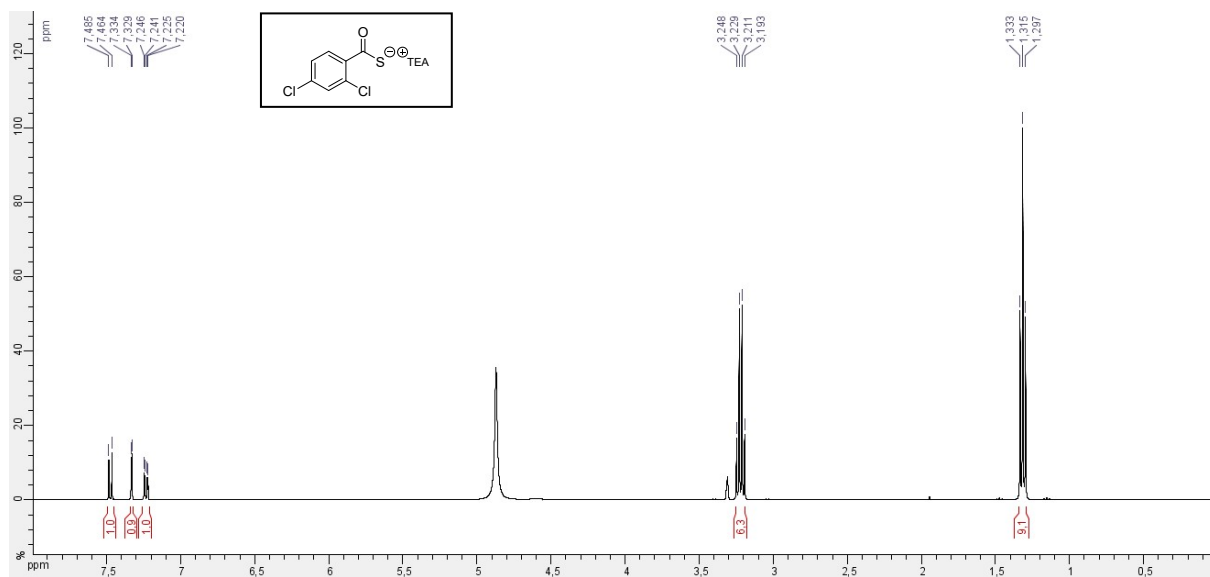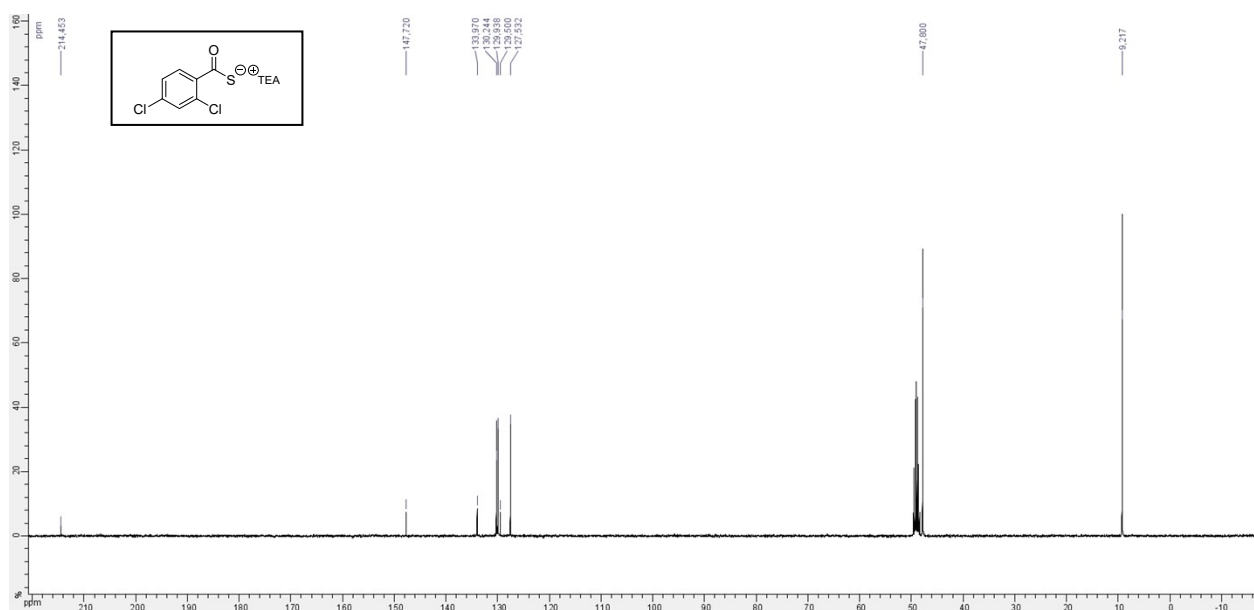

## Synthesis of sulfadrag analogues

### Triethylammonium ((4-acetamidophenyl)sulfonyl)(3-methoxybenzoyl)amide (4a)

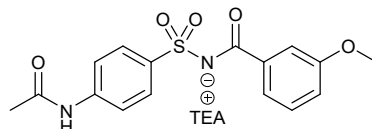

4-acetamidobenzenesulfonyl azide **1** (26 mg, 108  $\mu\text{mol}$ ) was dissolved in dry NMP (1.5 mL). Thereafter, triethylammonium 3-methoxybenzothioate **3a** (35 mg, 130  $\mu\text{mol}$ ), water (500  $\mu\text{L}$ ) and  $\text{NaHCO}_3$  (22 mg, 260  $\mu\text{mol}$ ) were sequentially added. The resulting mixture was stirred at room temperature for 4 h. The reaction was checked for completion by RP-HPLC (system B). Thereafter, aq. 50 mM TEAA (pH 7.0, 13.5 mL) was added and the resulting mixture was purified by RP-chromatography with a linear gradient of MeCN (0-30%) in  $\text{H}_2\text{O}$  as the mobile phase, giving the triethylammonium ((4-acetamidophenyl)sulfonyl)(3-methoxybenzoyl)amide **4a** as a white amorphous powder after lyophilization (45 mg, 99  $\mu\text{mol}$ , 92%, 96% purity).  $^1\text{H}$  NMR (400 MHz,  $\text{CDCl}_3$ ):  $\delta$  = 1.20 (t,  $J$  = 7.3 Hz, 9H), 2.12 (s, 3H), 3.06 (q,  $J$  = 7.3 Hz, 6H), 3.77 (s, 3H), 6.92-7.83 (m, 8H), 8.69 (bs, 1H) ppm.  $^{13}\text{C}$  NMR (100 MHz,  $\text{CDCl}_3$ ):  $\delta$  = 8.7, 24.6, 46.3, 55.5, 113.7, 117.2, 119.4, 121.4, 127.4, 128.8, 139.1, 139.7, 141.1, 159.4, 169.5, 172.9 ppm. HRMS (ESI)  $m/z$ :  $[\text{M}-\text{H}]^-$  Calcd for  $\text{C}_{16}\text{H}_{15}\text{N}_2\text{O}_5\text{S}$  347.0707; found 347.0715.

# <sup>1</sup>H and <sup>13</sup>C NMR Spectra (CDCl<sub>3</sub>)

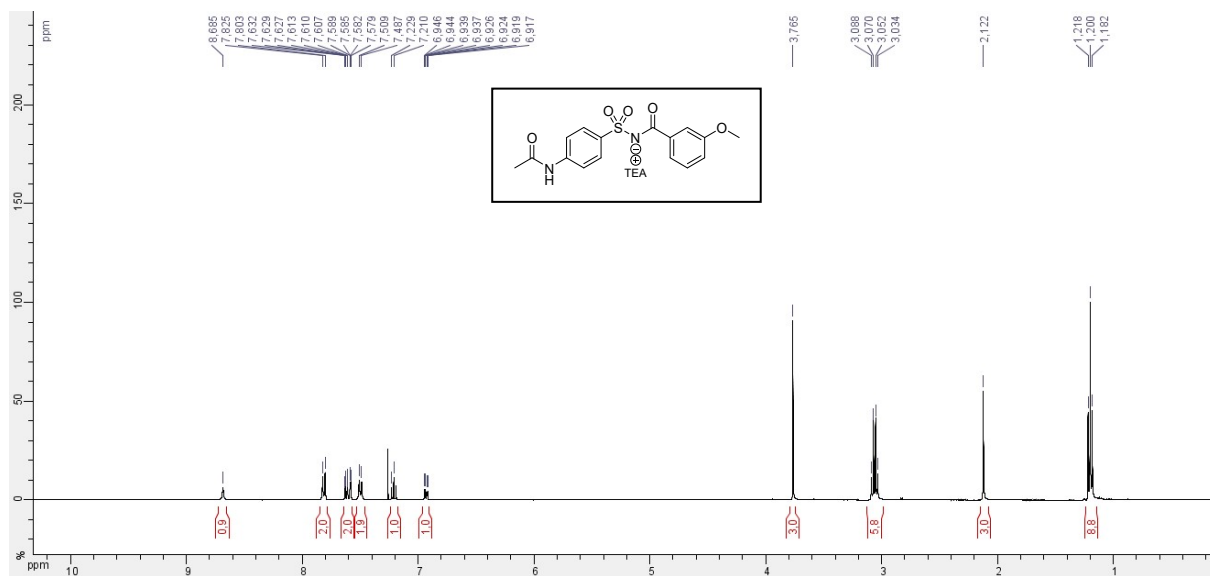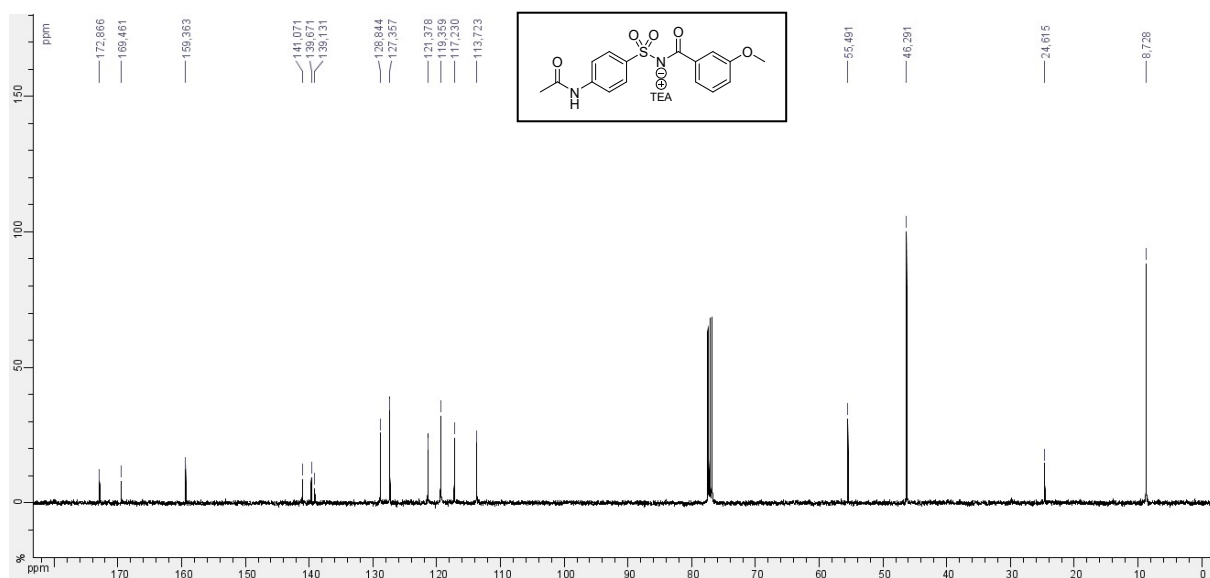

### Triethylammonium ((4-acetamidophenyl)sulfonyl)(2-methoxybenzoyl)amide (**4b**)

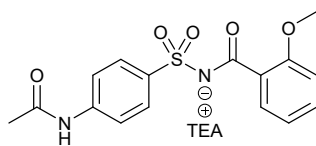

4-acetamidobenzenesulfonyl azide **1** (26 mg, 108  $\mu\text{mol}$ ) was dissolved in dry NMP (1.5 mL). Thereafter, triethylammonium 2-methoxybenzothioate **3b** (35 mg, 130  $\mu\text{mol}$ ), water (500  $\mu\text{L}$ ) and  $\text{NaHCO}_3$  (22 mg, 260  $\mu\text{mol}$ ) were sequentially added. The resulting mixture was stirred at room temperature for 4 h. The reaction was checked for completion by RP-HPLC (system B). Thereafter, aq. 50 mM TEAA (pH 7.0, 13.5 mL) was added and the resulting mixture was purified by RP-chromatography with a linear gradient of MeCN (0-30%) in  $\text{H}_2\text{O}$  as the mobile phase, giving the triethylammonium ((4-acetamidophenyl)sulfonyl)(2-methoxybenzoyl)amide **4b** as a white amorphous powder after lyophilization (44 mg, 97  $\mu\text{mol}$ , 90%, 96% purity).  $^1\text{H}$  NMR (400 MHz,  $\text{CDCl}_3$ ):  $\delta$  = 1.11 (t,  $J$  = 7.3 Hz, 9H), 2.08 (s, 3H), 2.73 (q,  $J$  = 7.3 Hz, 6H), 3.88 (s, 3H), 6.92-7.96 (m, 8H), 8.82 (bs, 1H) ppm.  $^{13}\text{C}$  NMR (100 MHz,  $\text{CDCl}_3$ ):  $\delta$  = 10.2, 24.6, 45.9, 56.2, 111.8, 119.2, 121.4, 123.4, 129.2, 131.1, 133.4, 134.8, 142.9, 157.4, 167.2, 169.6 ppm. HRMS (ESI)  $m/z$ :  $[\text{M}-\text{H}]^-$  Calcd for  $\text{C}_{16}\text{H}_{15}\text{N}_2\text{O}_5\text{S}$  347.0707; found 347.0707.

# <sup>1</sup>H and <sup>13</sup>C NMR Spectra (CDCl<sub>3</sub>)

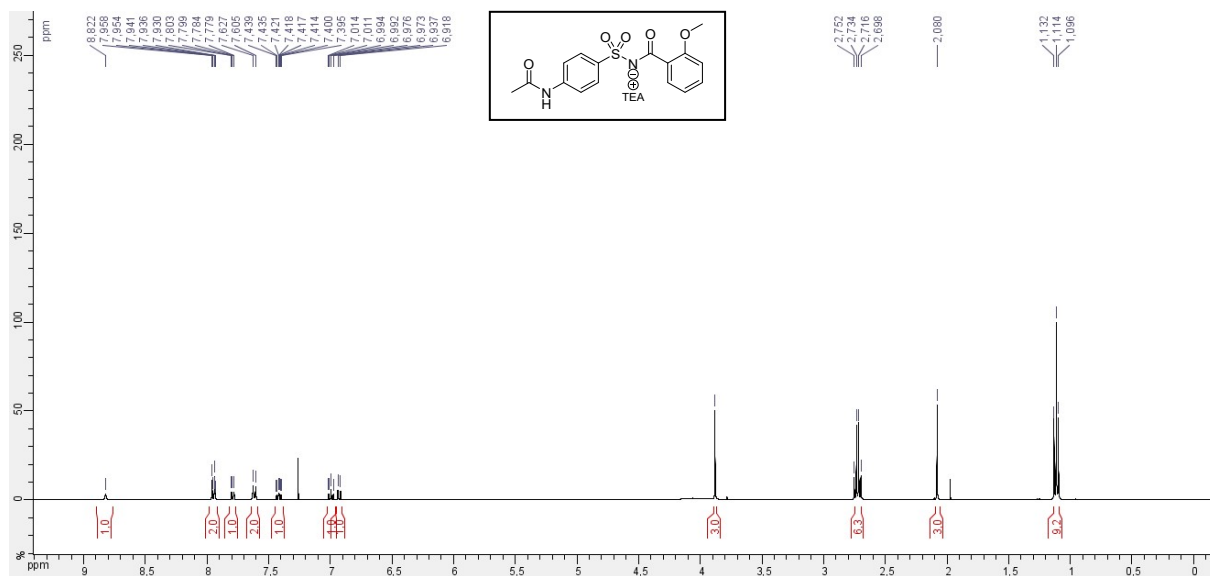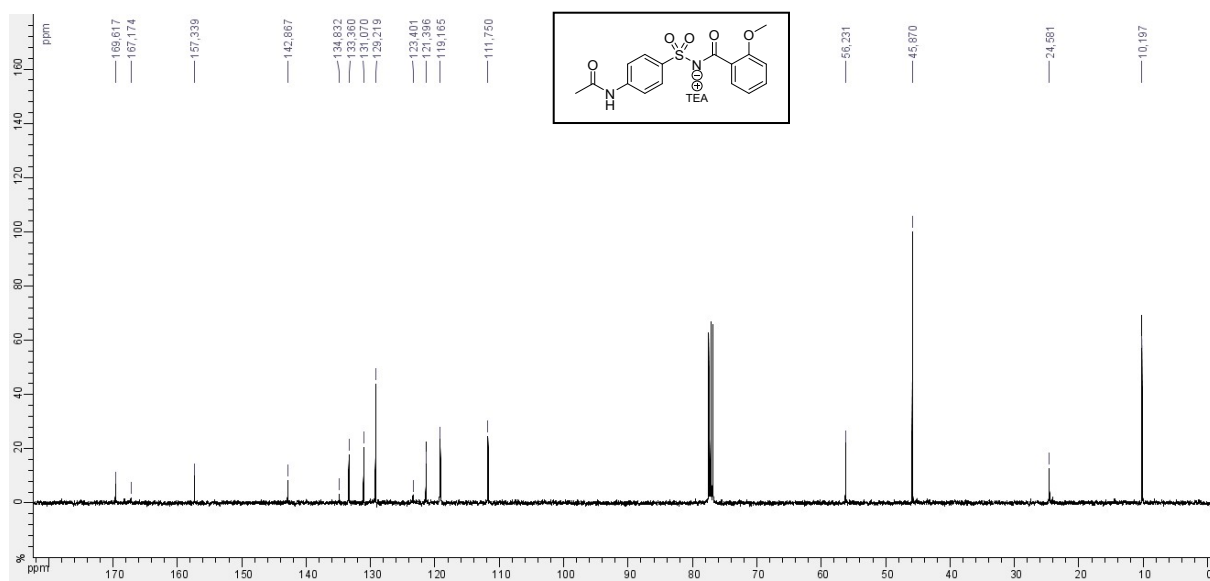

### Triethylammonium ((4-aminophenyl)sulfonyl)(4-nitrobenzoyl)amide (**4c**)

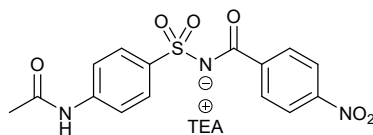

4-acetamidobenzenesulfonyl azide **1** (20 mg, 83  $\mu\text{mol}$ ) was dissolved in dry NMP (750  $\mu\text{L}$ ). Thereafter, triethylammonium 4-nitrobenzothioate **3c** (35 mg, 125  $\mu\text{mol}$ ), water (250  $\mu\text{L}$ ) and  $\text{NaHCO}_3$  (11 mg, 125  $\mu\text{mol}$ ) were sequentially added. The resulting mixture was stirred at room temperature for 4 h. The reaction was checked for completion by RP-HPLC (system B). Thereafter, aq. 50 mM TEAA (pH 7.0, 9 mL) was added and the resulting mixture was purified by RP-chromatography with a linear gradient of MeCN (0-30%) in  $\text{H}_2\text{O}$  as the mobile phase, giving the triethylammonium ((4-aminophenyl)sulfonyl)(4-nitrobenzoyl)amide **4c** as a yellow amorphous powder after lyophilization (29 mg, 69  $\mu\text{mol}$ , 84%, 97% purity).  $^1\text{H}$  NMR (400 MHz,  $\text{CDCl}_3$ ):  $\delta$  = 1.26 (t,  $J$  = 7.3 Hz, 9H), 2.13 (s, 3H), 3.14 (q,  $J$  = 7.3 Hz, 6H), 7.54-8.21 (m, 8H), 8.64 (s, 1H) ppm.  $^{13}\text{C}$  NMR (100 MHz,  $\text{CDCl}_3$ ):  $\delta$  = 8.7, 24.6, 46.4, 119.3, 123.0, 127.2, 129.9, 139.0, 141.2, 144.3, 149.3, 169.5, 170.6 ppm. HRMS (ESI)  $m/z$ :  $[\text{M}-\text{H}]^-$  Calcd for  $\text{C}_{15}\text{H}_{12}\text{N}_3\text{O}_6\text{S}$ : 362.0447; found 362.0453.



# <sup>1</sup>H and <sup>13</sup>C NMR Spectra (CDCl<sub>3</sub>)

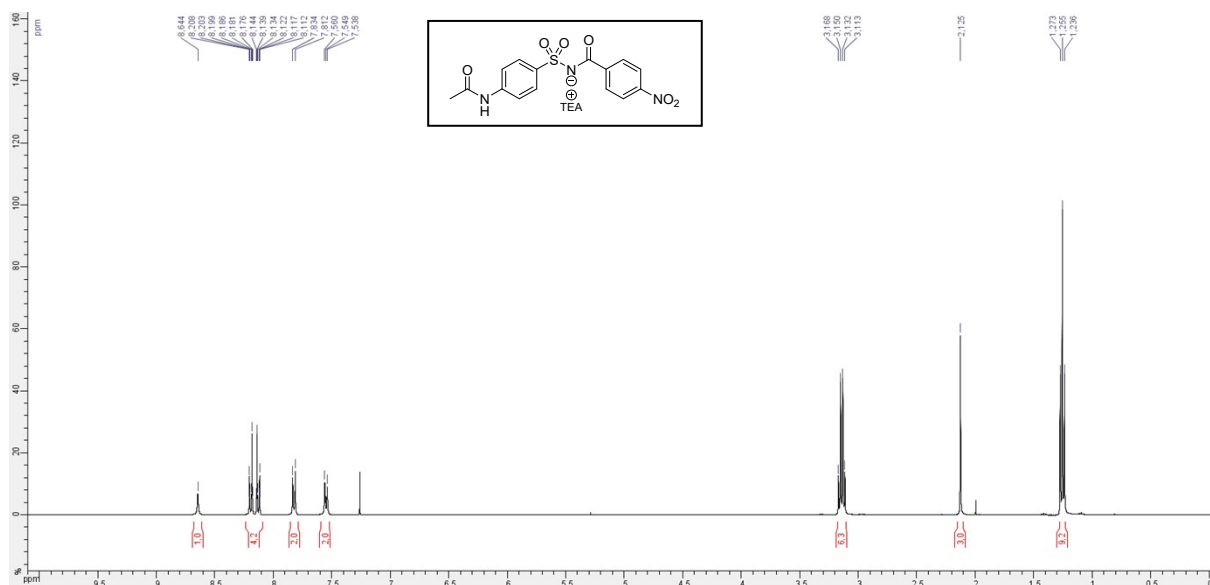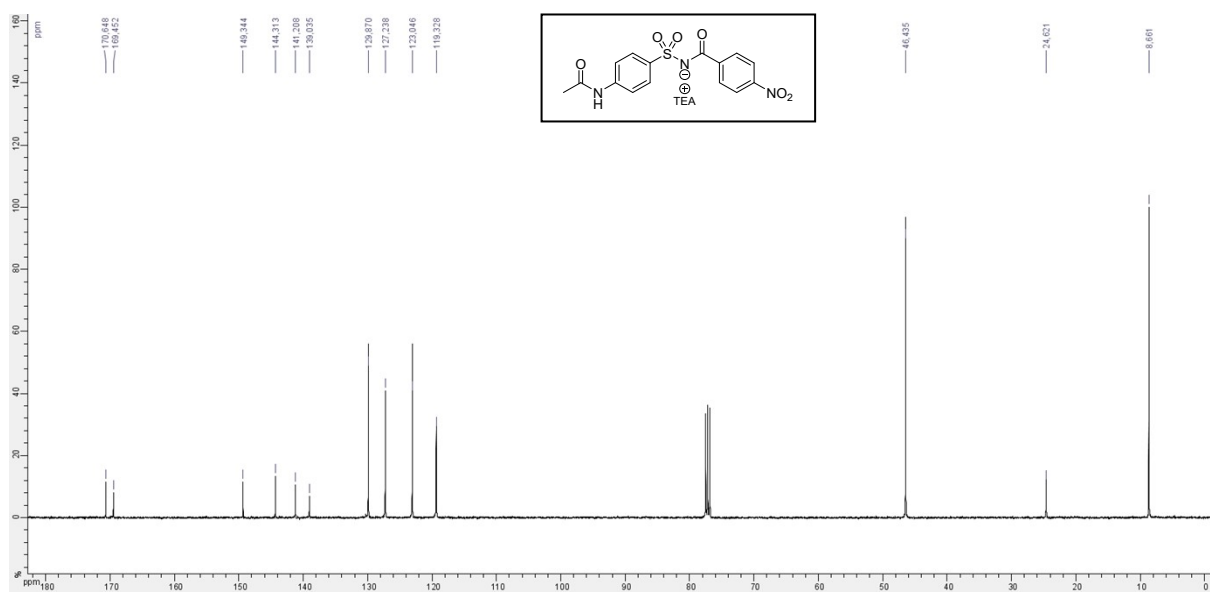

### Triethylammonium ((4-aminophenyl)sulfonyl)(3-methoxy-4-nitrobenzoyl)amide (**4d**)

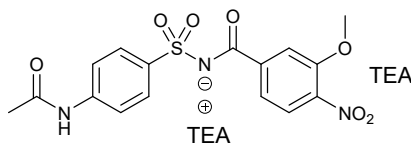

4-acetamidobenzenesulfonyl azide **1** (20 mg, 83  $\mu\text{mol}$ ) was dissolved in dry NMP (750  $\mu\text{L}$ ). Thereafter, triethylammonium 3-methoxy-4-nitrobenzothioate **3d** (39 mg, 125  $\mu\text{mol}$ ), water (250  $\mu\text{L}$ ) and  $\text{NaHCO}_3$  (7 mg, 83  $\mu\text{mol}$ ) were sequentially added. The resulting mixture was stirred at room temperature for 4 h. The reaction was checked for completion by RP-HPLC (system B). Thereafter, aq. 50 mM TEAA (pH 7.0, 9 mL) was added and the resulting mixture was purified by RP-chromatography with a linear gradient of MeCN (0-30%) in  $\text{H}_2\text{O}$  as the mobile phase, giving the triethylammonium ((4-aminophenyl)sulfonyl)(3-methoxy-4-nitrobenzoyl)amide **4d** as a white amorphous powder after lyophilization (38 mg, 77  $\mu\text{mol}$ , 93%, 97% purity).  $^1\text{H}$  NMR (400 MHz,  $\text{CDCl}_3$ ):  $\delta$  = 1.33 (t,  $J$  = 7.3 Hz, 18H), 2.18 (s, 3H), 3.12 (q,  $J$  = 7.3 Hz, 12H), 3.93 (s, 3H), 7.61-7.87 (m, 7H), 8.56 (s, 1H) ppm.  $^{13}\text{C}$  NMR (100 MHz,  $\text{CDCl}_3$ ):  $\delta$  = 8.7, 24.7, 46.2, 56.8, 114.2, 119.2, 120.7, 125.0, 127.4, 139.1, 140.9, 141.2, 144.1, 152.5, 169.3, 170.5 ppm. HRMS (ESI)  $m/z$ :  $[\text{M}-\text{H}]^-$  Calcd for  $\text{C}_{16}\text{H}_{14}\text{N}_3\text{O}_7\text{S}$ : 392.0558; found 392.0567.

# <sup>1</sup>H and <sup>13</sup>C NMR Spectra (CDCl<sub>3</sub>)

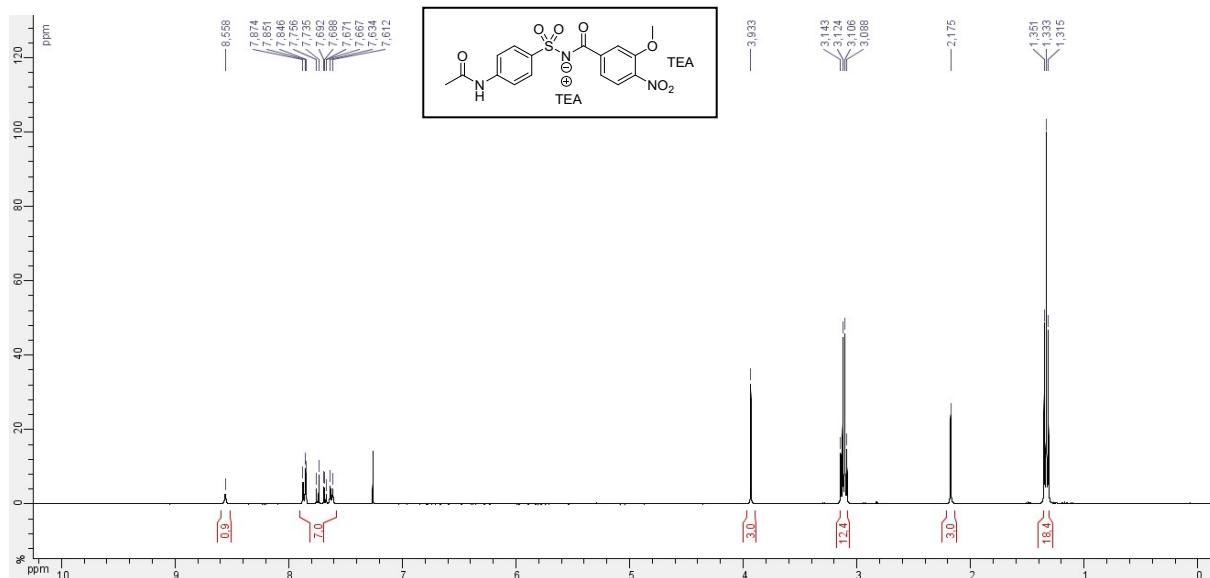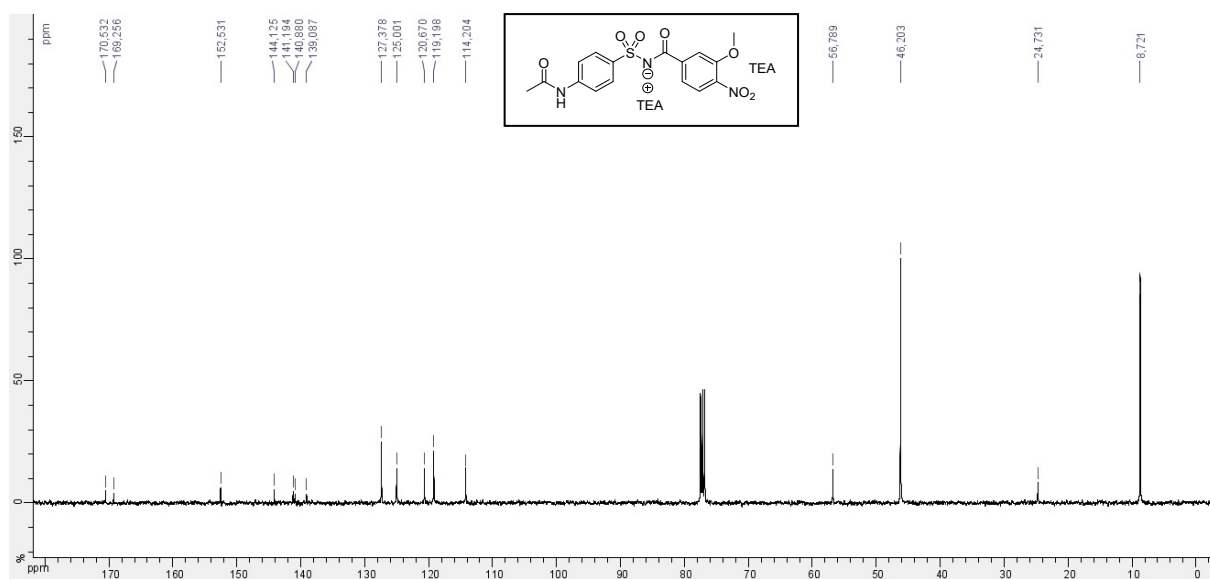

### Triethylammonium ((4-acetamidophenyl)sulfonyl)(4-(trifluoromethyl)benzoyl)amide (4e)

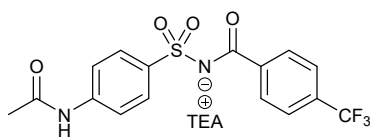

4-acetamidobenzenesulfonyl azide **1** (25 mg, 102  $\mu\text{mol}$ ) was dissolved in dry NMP (1.5 mL). Thereafter, triethylammonium 4-(trifluoromethyl)benzothioate **3e** (47 mg, 153  $\mu\text{mol}$ ), water (500  $\mu\text{L}$ ) and  $\text{NaHCO}_3$  (13 mg, 65  $\mu\text{mol}$ ) were sequentially added. The resulting mixture was stirred at room temperature for 4 h. The reaction was checked for completion by RP-HPLC (system B). Thereafter, aq. 50 mM TEAA (pH 7.0, 13.5 mL) was added and the resulting mixture was purified by RP-chromatography with a linear gradient of MeCN (0-30%) in  $\text{H}_2\text{O}$  as the mobile phase, giving the triethylammonium ((4-acetamidophenyl)sulfonyl)(4-(trifluoromethyl)benzoyl)amide **4e** as an orange amorphous powder after lyophilization (49 mg, 100  $\mu\text{mol}$ , quant., 97% purity).  $^1\text{H}$  NMR (400 MHz,  $\text{CDCl}_3$ ):  $\delta$  = 1.26 (t,  $J$  = 7.3 Hz, 9H), 2.15 (s, 3H), 3.14 (q,  $J$  = 7.3 Hz, 6H), 7.50-8.17 (m, 8H), 8.37 (bs, 1H) ppm.  $^{13}\text{C}$  NMR (100 MHz,  $\text{CDCl}_3$ ):  $\delta$  = 8.5, 24.6, 48.2, 119.2, 124.7 (q,  $J_{\text{C-F}}$  = 3.7 Hz) 127.2, 129.1, 132.1, 132.5, 139.0, 140.9, 141.4, 169.1, 171.3 ppm. HRMS (ESI)  $m/z$ :  $[\text{M-H}]^-$  Calcd for  $\text{C}_{16}\text{H}_{12}\text{F}_3\text{N}_2\text{O}_4\text{S}$  385.0475; found 385.0478.

# <sup>1</sup>H and <sup>13</sup>C NMR Spectra (CDCl<sub>3</sub>)

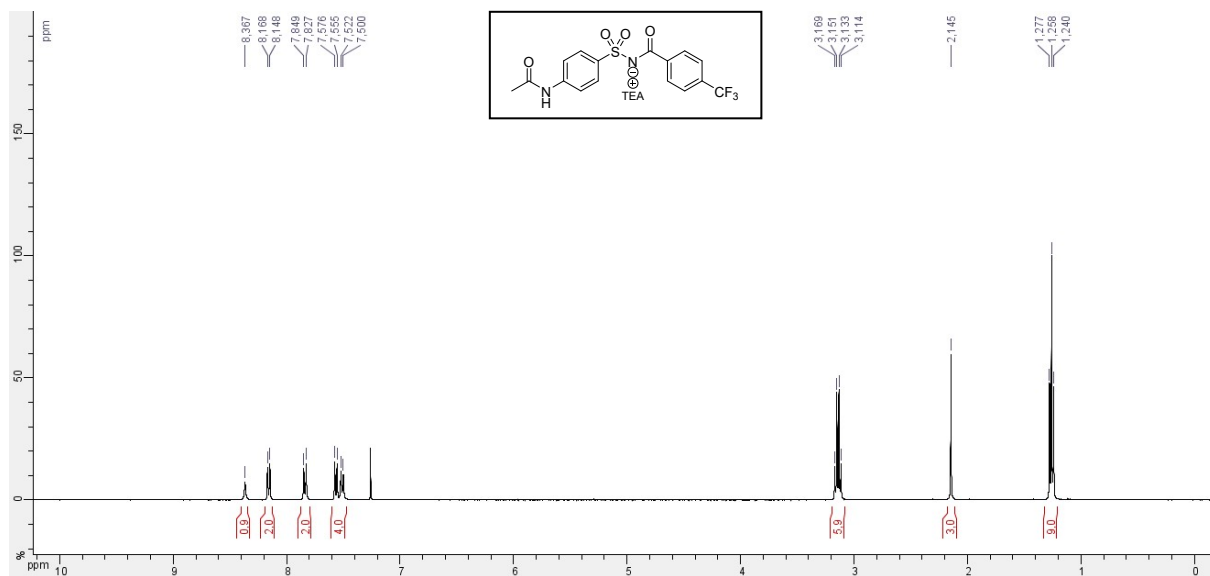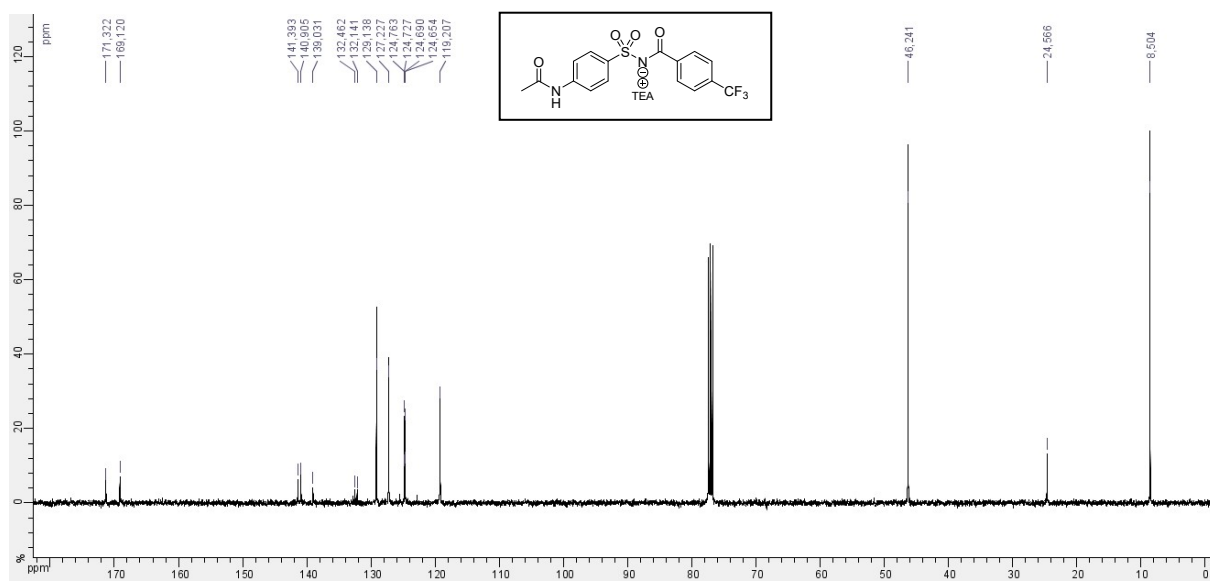

### Triethylammonium ((4-acetamidophenyl)sulfonyl)(3,4,5-trifluorobenzoyl)amide (**4f**)

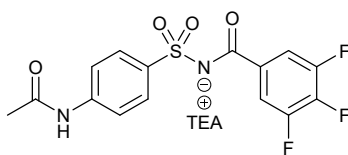

4-acetamidobenzenesulfonyl azide **1** (41 mg, 171  $\mu\text{mol}$ ) was dissolved in dry NMP (2 mL). Thereafter, triethylammonium 3,4,5-trifluorobenzothioate **3f** (75 mg, 256  $\mu\text{mol}$ ), water (650  $\mu\text{L}$ ) and  $\text{NaHCO}_3$  (14 mg, 171  $\mu\text{mol}$ ) were sequentially added. The resulting mixture was stirred at room temperature for 4 h. The reaction was checked for completion by RP-HPLC (system B). Thereafter, aq. 50 mM TEAA (pH 7.0, 18 mL) was added and the resulting mixture was purified by RP-chromatography with a linear gradient of MeCN (0-30%) in  $\text{H}_2\text{O}$  as the mobile phase, giving the triethylammonium ((4-acetamidophenyl)sulfonyl)(3,4,5-trifluorobenzoyl)amide **4f** as a white amorphous powder after lyophilization (76 mg, 160  $\mu\text{mol}$ , 94%, 95% purity).  $^1\text{H}$  NMR (500 MHz,  $\text{CDCl}_3$ ):  $\delta$  = 1.33 (t,  $J$  = 7.3 Hz, 9H), 2.19 (s, 3H), 3.22 (q,  $J$  = 7.3 Hz, 6H), 7.49 (bs, 1H), 7.56-7.93 (m, 6H) ppm.  $^{13}\text{C}$  NMR (125 MHz,  $\text{CDCl}_3$ ):  $\delta$  = 8.6, 24.9, 46.3, 113.0-113.2 (m), 119.0, 127.7, 133.9, 139.0, 140.7, 141.8 (dt,  $J_{1\text{C-F}}$  = 256 Hz,  $J_{2\text{C-F}}$  = 16 Hz), 150.1 (dd,  $J_{1\text{C-F}}$  = 250 Hz,  $J_{2\text{C-F}}$  = 10.9 Hz), 168.6 ppm. HRMS (ESI)  $m/z$ :  $[\text{M-H}]^-$  Calcd for  $\text{C}_{15}\text{H}_{10}\text{F}_3\text{N}_2\text{O}_4\text{S}$ : 371.0319; found 371.0319.

# <sup>1</sup>H and <sup>13</sup>C NMR Spectra (CDCl<sub>3</sub>)

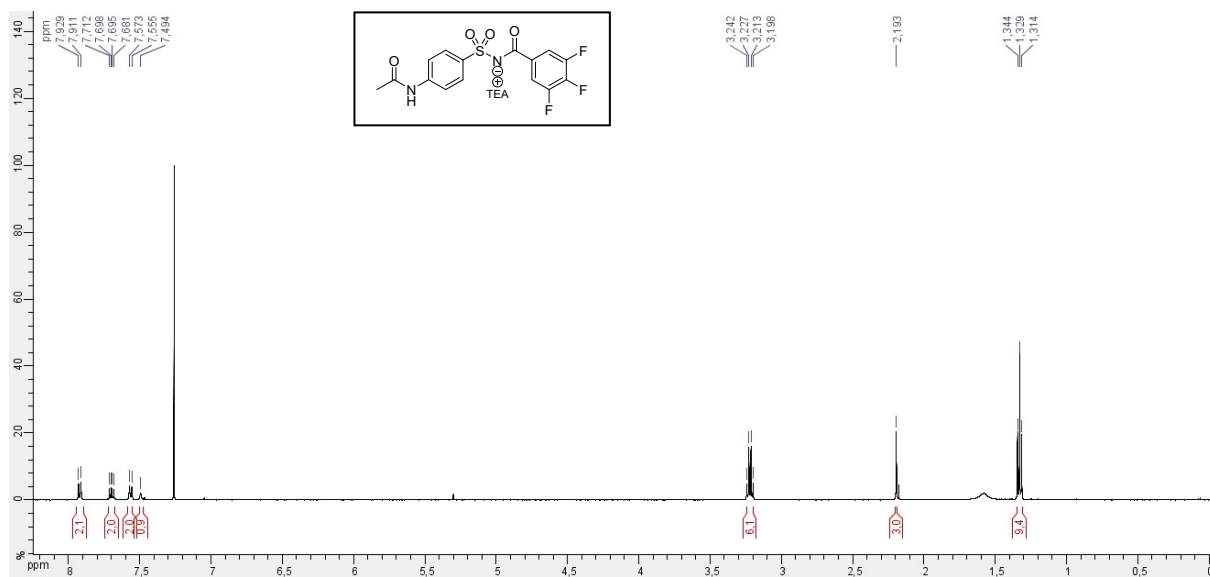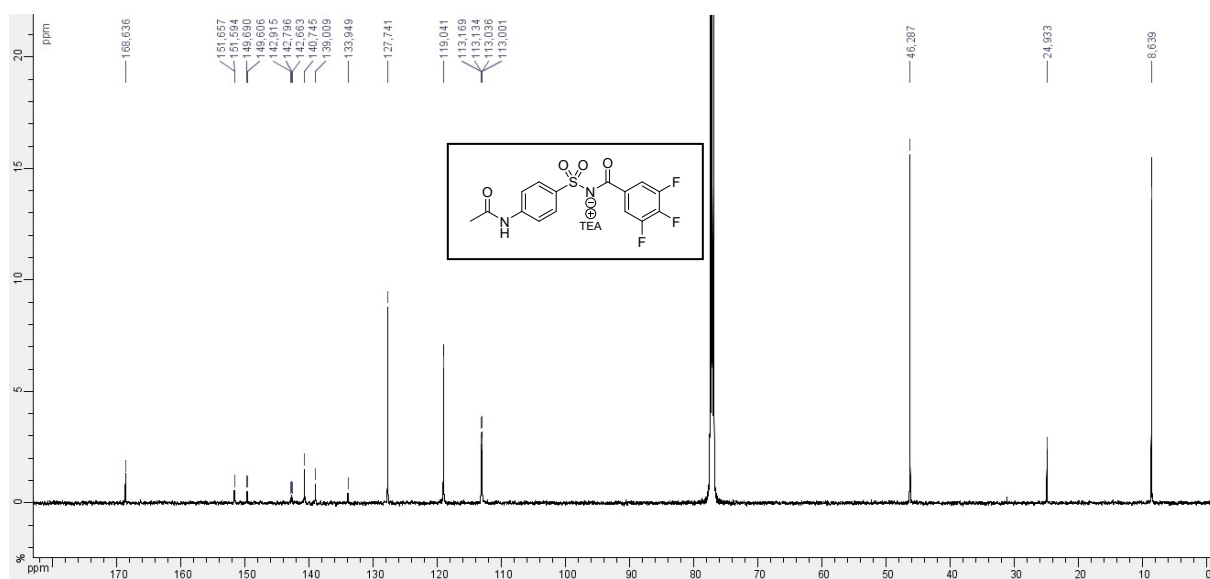

### Triethylammonium ((4-acetamidophenyl)sulfonyl)(2,4-dichlorobenzoyl)amide (**4g**)

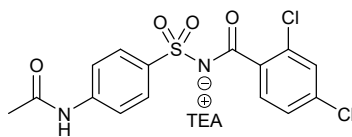

4-acetamidobenzenesulfonyl azide **1** (16 mg, 65  $\mu\text{mol}$ ) was dissolved in dry NMP (750  $\mu\text{L}$ ). Thereafter, triethylammonium 2,4-dichlorobenzothioate **3g** (30 mg, 97  $\mu\text{mol}$ ), water (250  $\mu\text{L}$ ) and  $\text{NaHCO}_3$  (6 mg, 65  $\mu\text{mol}$ ) were sequentially added. The resulting mixture was stirred at room temperature for 4 h. The reaction was checked for completion by RP-HPLC (system B). Thereafter, aq. 50 mM TEAA (pH 7.0, 9 mL) was added and the resulting mixture was purified by RP-chromatography with a linear gradient of MeCN (0-30%) in  $\text{H}_2\text{O}$  as the mobile phase, giving the triethylammonium ((4-acetamidophenyl)sulfonyl)(2,4-dichlorobenzoyl)amide **4g** as a white amorphous powder after lyophilization (30 mg, 61  $\mu\text{mol}$ , 93%, 99% purity).  $^1\text{H}$  NMR (400 MHz,  $\text{CDCl}_3$ ):  $\delta$  = 1.16 (t,  $J$  = 7.3 Hz, 9H), 2.98 (q,  $J$  = 7.3 Hz, 6H), 7.14-7.81 (m, 7H), 9.25 (s, 1H) ppm.  $^{13}\text{C}$  NMR (100 MHz,  $\text{CDCl}_3$ ):  $\delta$  = 8.6, 24.5, 46.1, 119.3, 126.9, 127.7, 129.8, 130.5, 131.9, 135.2, 137.3, 137.5, 141.9, 170.0, 171.4 ppm. HRMS (ESI)  $m/z$ :  $[\text{M}-\text{H}]^-$  Calcd for  $\text{C}_{15}\text{H}_{11}\text{Cl}_2\text{N}_2\text{O}_4\text{S}$ : 384.9822; found 384.9827.



# <sup>1</sup>H and <sup>13</sup>C NMR Spectra (CDCl<sub>3</sub>)

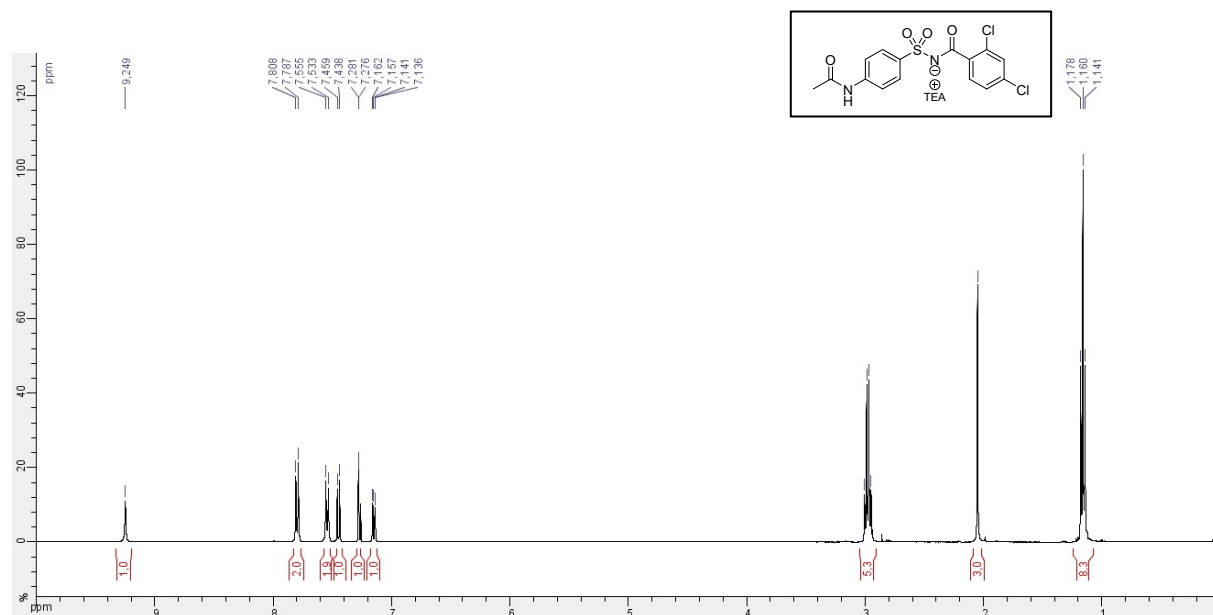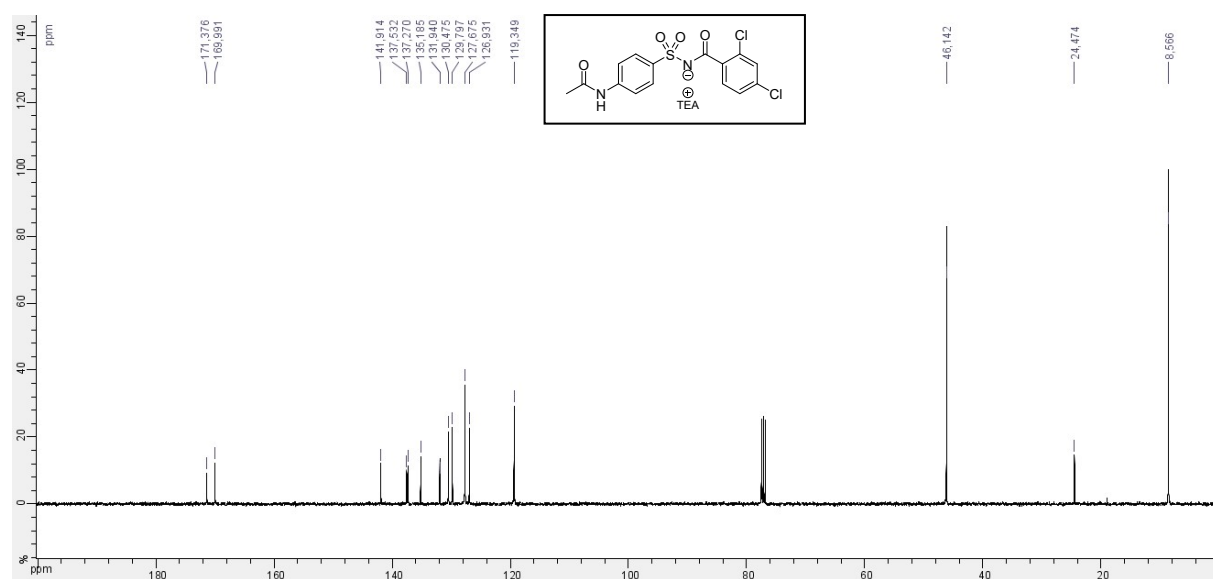

### ***N*-((4-acetamidophenyl)sulfonyl)benzamide (**4h**)**

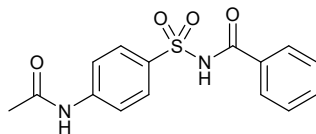

4-acetamidobenzenesulfonyl azide **1** (127 mg, 530  $\mu\text{mol}$ ) was dissolved in dry MeCN (12 mL). Thereafter, thiobenzoic acid **3h** (93  $\mu\text{L}$ , 795  $\mu\text{mol}$ ), water (4 mL) and  $\text{NaHCO}_3$  (134 mg, 1.6 mmol) were sequentially added. The resulting mixture was stirred at room temperature for 16 h. The reaction was checked for completion by TLC (DCM-MeOH, 96 : 4, v/v) and evaporated to dryness. The resulting residue was purified by chromatography on a silica gel column with a linear gradient of MeOH (0-20%) in DCM as the mobile phase, giving *N*-((4-acetamidophenyl)sulfonyl)benzamide **4h** as a white powder (152 mg, 477  $\mu\text{mol}$ , 90%, 97% purity).  $^1\text{H}$  NMR (400 MHz, DMSO):  $\delta$  = 2.09 (s, 3H), 7.44-7.94 (m, 9H), 10.40 (s, 1H) ppm.  $^{13}\text{C}$  NMR (100 MHz, DMSO):  $\delta$  = 24.2, 118.3, 128.4, 128.5, 129.0, 132.4, 132.8, 133.6, 143.5, 165.8, 169.1 ppm. HRMS (ESI)  $m/z$ :  $[\text{M}-\text{H}]^-$  Calcd for  $\text{C}_{16}\text{H}_{14}\text{N}_3\text{O}_7\text{S}$ : 392.0558; found 392.0567.

# <sup>1</sup>H and <sup>13</sup>C NMR Spectra (DMSO)

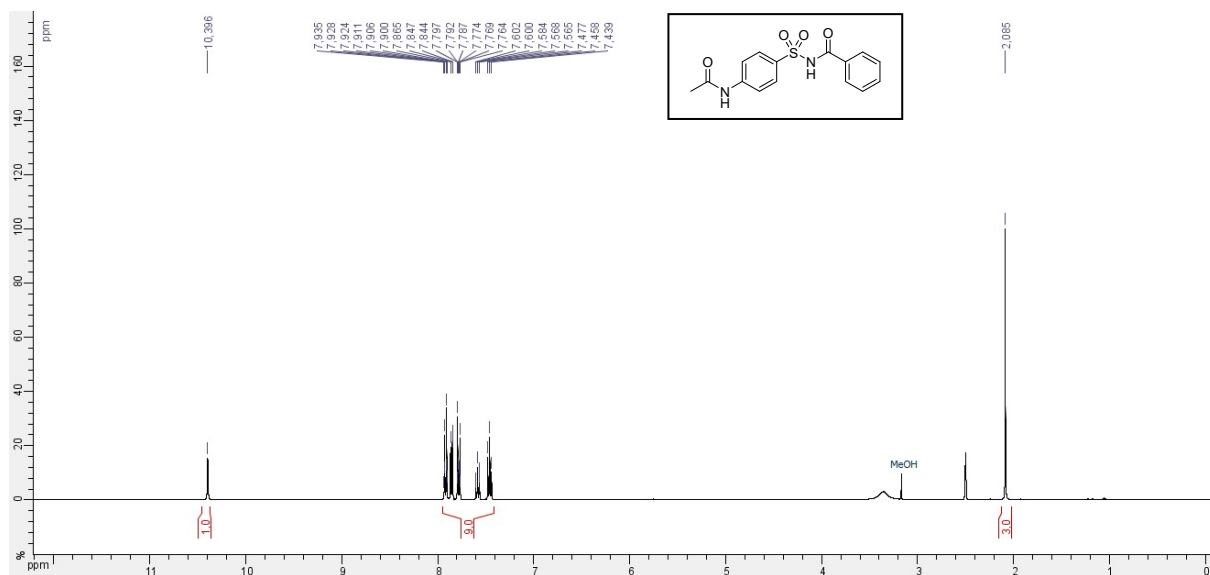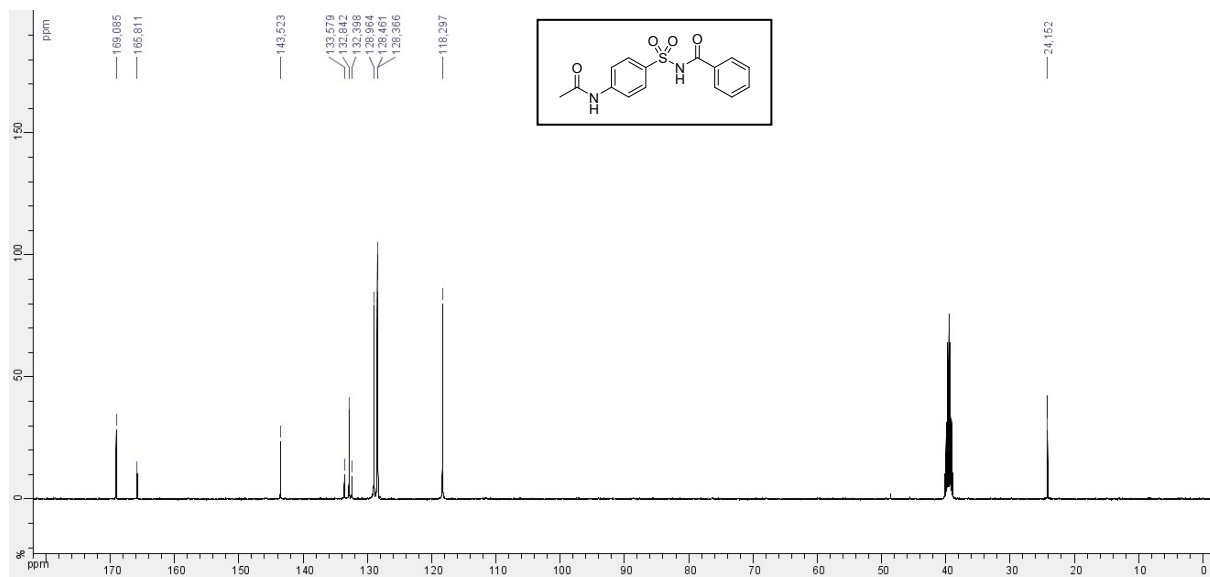

### ***N*-((4-acetamidophenyl)sulfonyl)acetamide (**4i**)**

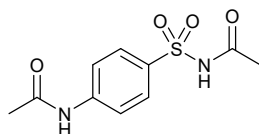

4-acetamidobenzenesulfonyl azide **1** (100 mg, 417  $\mu\text{mol}$ ) was dissolved in dry MeCN (7.5 mL). Thereafter, potassium thioacetate **3i** (71 mg, 625  $\mu\text{mol}$ ), water (2.5 mL) and  $\text{NaHCO}_3$  (53 mg, 625  $\mu\text{mol}$ ) were sequentially added. The resulting mixture was stirred at room temperature for 16 h. The reaction was checked for completion by TLC (DCM-MeOH, 96 : 4, v/v) and evaporated to dryness. The resulting residue was purified by chromatography on a silica gel column with a linear gradient of MeOH (0-20%) in DCM as the mobile phase, giving *N*-((4-acetamidophenyl)sulfonyl)acetamide **4i** as a white powder (97 mg, 379  $\mu\text{mol}$ , 91%, 97% purity).  $^1\text{H}$  NMR (400 MHz, DMSO):  $\delta$  = 1.90 (s, 3H), 2.09 (s, 3H), 7.76-7.84 (m, 4H), 10.39 (s, 1H), 11.96 (bs, 1H) ppm.  $^{13}\text{C}$  NMR (100 MHz, DMSO):  $\delta$  = 23.2, 24.1, 118.4, 128.8, 132.8, 143.7, 168.7, 169.1 ppm. HRMS (ESI)  $m/z$ :  $[\text{M}+\text{H}]^+$  Calcd for  $\text{C}_{10}\text{H}_{13}\text{N}_2\text{O}_4\text{S}$ : 257.0591; found 257.0601.

# <sup>1</sup>H and <sup>13</sup>C NMR Spectra (DMSO)

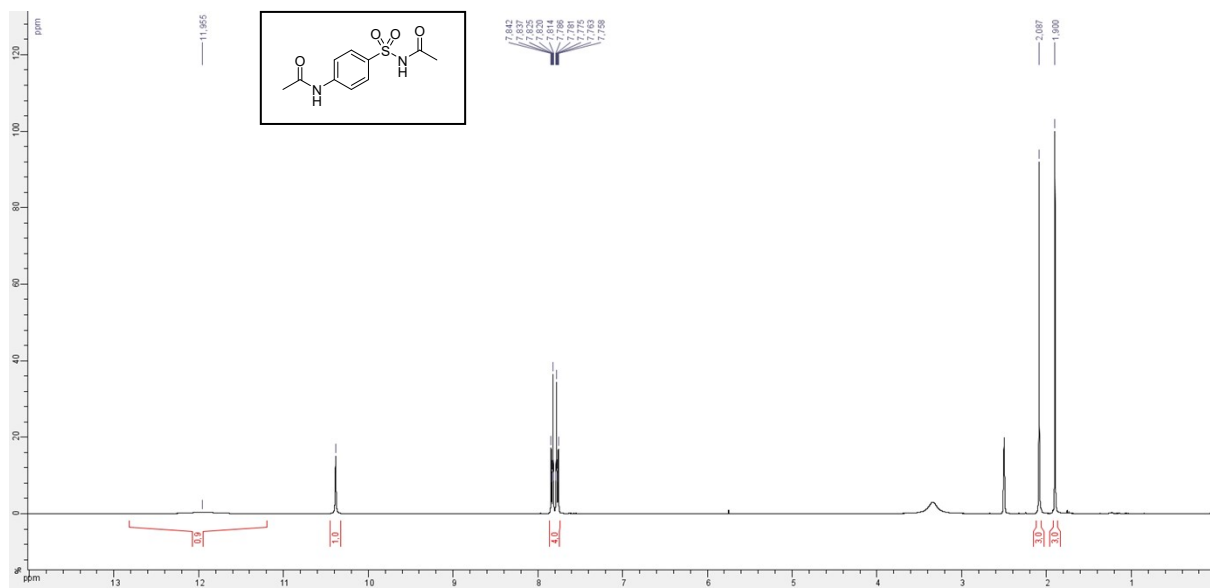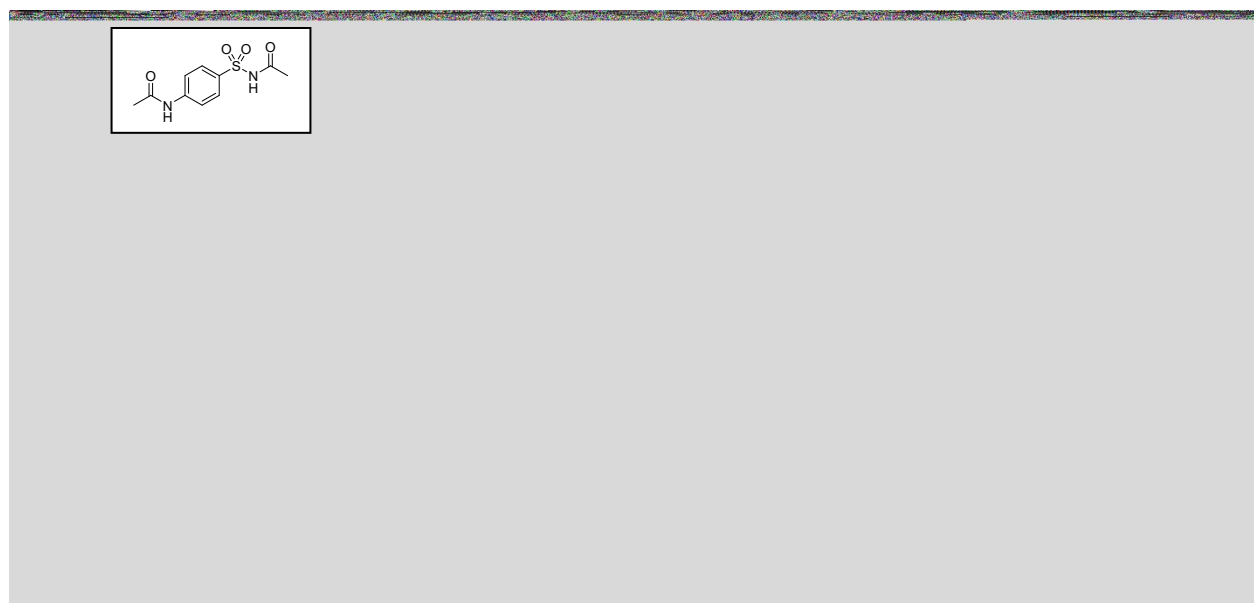

### ***N*-((4-aminophenyl)sulfonyl)-3-methoxybenzamide (5a)**

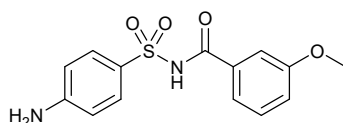

4-aminobenzenesulfonyl azide **2** (14 mg, 58  $\mu\text{mol}$ ) was dissolved in dry NMP (1.5 mL). Thereafter, triethylammonium 3-methoxybenzothioate **3a** (22 mg, 81  $\mu\text{mol}$ ), water (500  $\mu\text{L}$ ) and  $\text{NaHCO}_3$  (14 mg, 162  $\mu\text{mol}$ ) were sequentially added. The resulting mixture was stirred at room temperature for 4 h. The reaction was checked for completion by RP-HPLC (system A). 0.1% aq. TFA (pH 2.0, 15 mL) was added and the resulting mixture was purified by RP-chromatography with a linear gradient of MeCN (0-50%) in 0.1% aq. TFA as the mobile phase, giving the *N*-((4-aminophenyl)sulfonyl)-3-methoxybenzamide **5a** as a white amorphous powder after lyophilization (19 mg, 46  $\mu\text{mol}$ , 80%, 97% purity).  $^1\text{H}$  NMR (400 MHz, DMSO):  $\delta$  = 3.79 (s, 3H), 6.61-6.64 (m, 2H), 7.14-7.16 (m, 1H), 7.35-7.45 (m, 3H), 7.61-7.65 (m, 2H), 12.01 (bs, 1H) ppm.  $^{13}\text{C}$  NMR (100 MHz, DMSO):  $\delta$  = 55.4, 112.3, 112.7, 119.4, 120.6, 123.7, 129.7, 130.1, 133.1, 153.7, 159.2, 164.7 ppm. HRMS (ESI)  $m/z$ :  $[\text{M}+\text{H}]^+$  Calcd for  $\text{C}_{14}\text{H}_{15}\text{N}_2\text{O}_4\text{S}$ : 307.0747; found 307.0753.

# <sup>1</sup>H and <sup>13</sup>C NMR Spectra (DMSO)

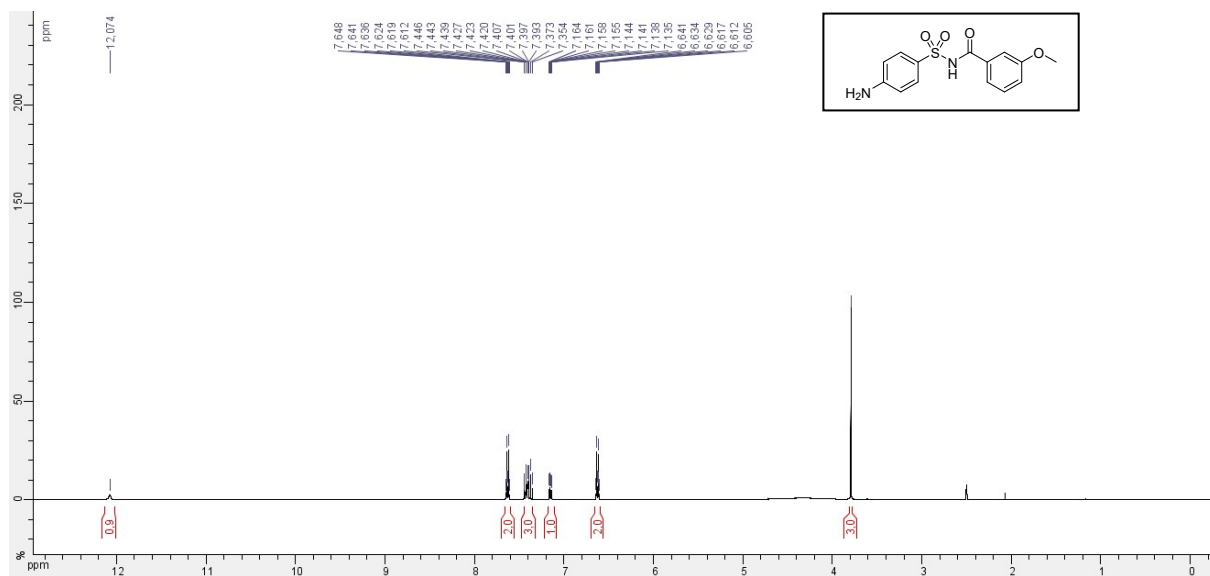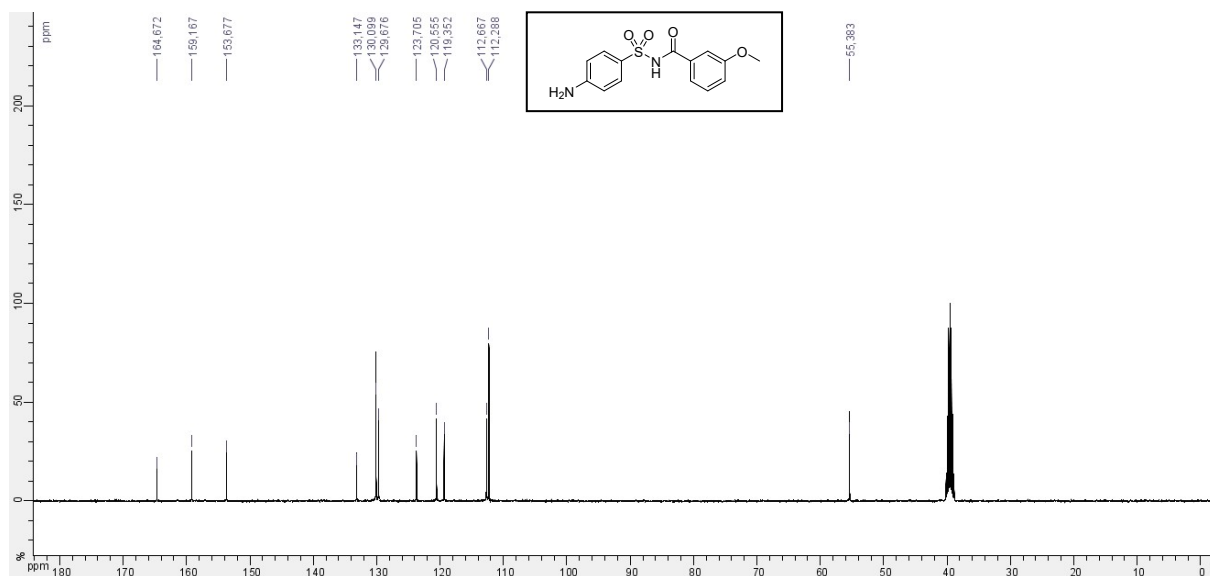

### ***N*-((4-aminophenyl)sulfonyl)-2-methoxybenzamide (**5b**)**

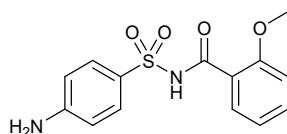

4-aminobenzenesulfonyl azide **2** (24 mg, 100  $\mu\text{mol}$ ) was dissolved in dry NMP (1.5 mL). Thereafter, triethylammonium 2-methoxybenzothioate **3b** (15 mg, 67  $\mu\text{mol}$ ), water (500  $\mu\text{L}$ ) and  $\text{NaHCO}_3$  (17 mg, 200  $\mu\text{mol}$ ) were sequentially added. The resulting mixture was stirred at room temperature for 4 h. The reaction was checked for completion by RP-HPLC (system B). Thereafter, aq. 50 mM TEAA (pH 7.0, 13.5 mL) was added and the resulting mixture was purified by RP-chromatography with a linear gradient of MeCN (0-40%) in aq. 50 mM TEAA as the mobile phase, giving the *N*-((4-aminophenyl)sulfonyl)-2-methoxybenzamide **5b** as a white amorphous powder after lyophilization (26 mg, 86  $\mu\text{mol}$ , 78%, 95% purity).  $^1\text{H}$  NMR (500 MHz, DMSO):  $\delta$  = 3.82 (s, 3H), 6.17 (s, 2H), 6.60-6.63 (m, 2H), 6.96-6.99 (m, 1H), 7.11 (d,  $J$  = 8.4 Hz, 1H), 7.38-7.40 (m, 1H), 7.46-7.50 (m, 1H), 7.58-7.61 (m, 2H) ppm.  $^{13}\text{C}$  NMR (125 MHz, DMSO):  $\delta$  = 56.0, 112.2, 112.3, 120.4, 122.6, 123.9, 129.7, 130.0, 133.2, 153.7, 157.0, 164.5 ppm. HRMS (ESI)  $m/z$ :  $[\text{M}+\text{H}]^+$  Calcd for  $\text{C}_{14}\text{H}_{15}\text{N}_2\text{O}_4\text{S}$ : 307.0747; found 307.0749.



# <sup>1</sup>H and <sup>13</sup>C NMR Spectra (DMSO)

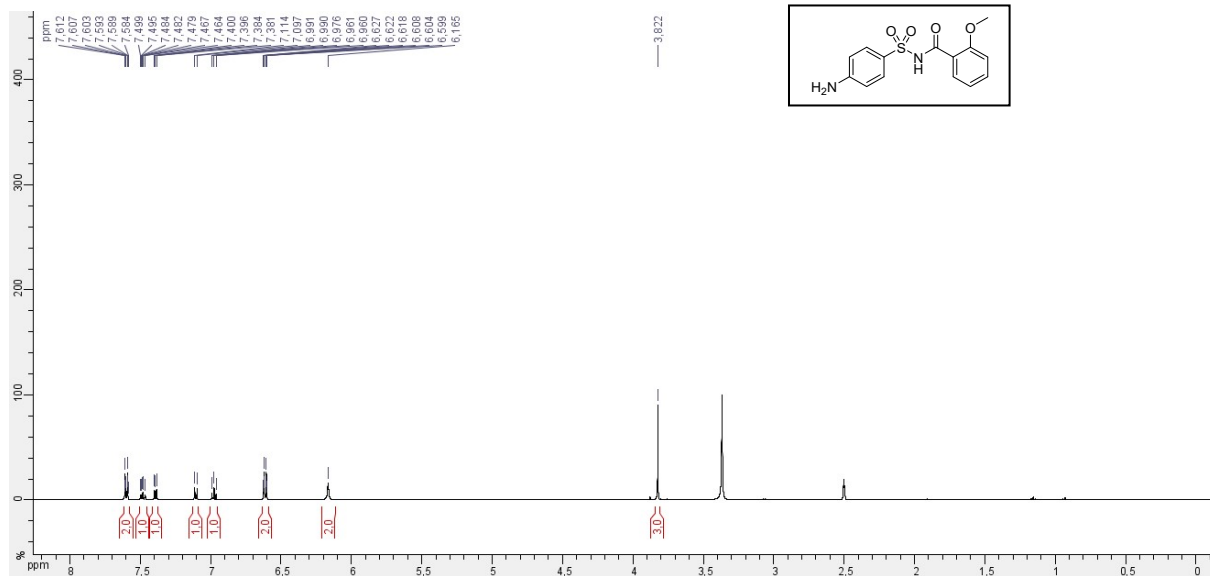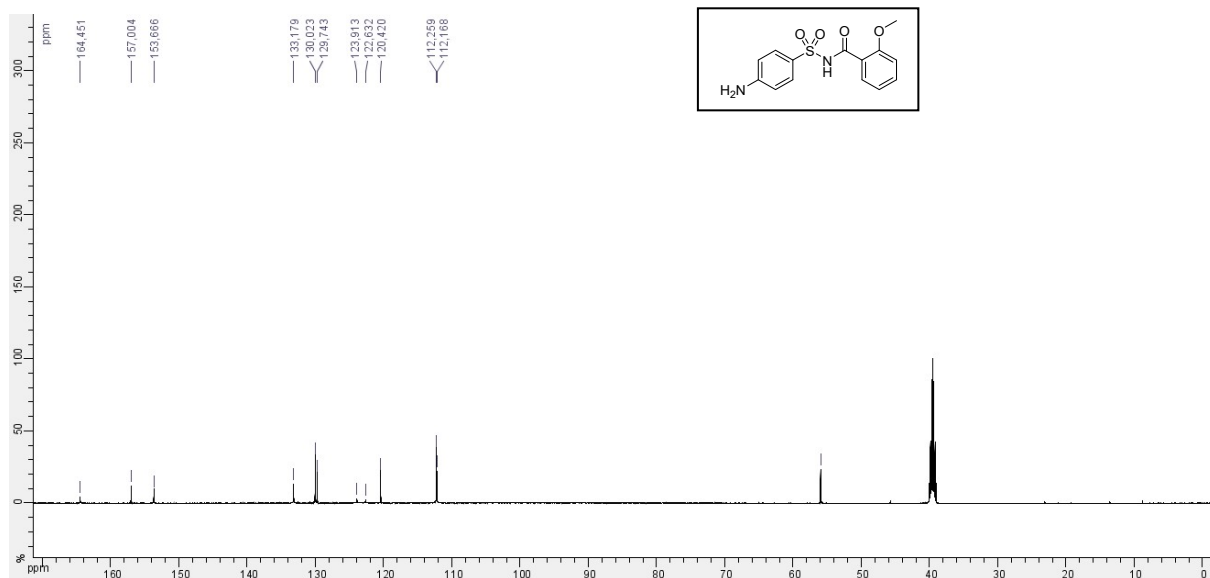

### ***N*-((4-aminophenyl)sulfonyl)-4-nitrobenzamide (**5c**)**

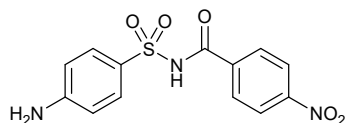

4-aminobenzenesulfonyl azide **2** (34 mg, 145  $\mu\text{mol}$ ) was dissolved in dry NMP (750  $\mu\text{L}$ ). Thereafter, triethylammonium 4-nitrobenzothioate **3c** (27 mg, 97  $\mu\text{mol}$ ), water (250  $\mu\text{L}$ ) and  $\text{NaHCO}_3$  (24 mg, 290  $\mu\text{mol}$ ) were sequentially added. The resulting mixture was stirred at room temperature for 4 h. The reaction was checked for completion by RP-HPLC (system A). 0.1% aq. TFA (pH 2.0, 9 mL) was added and the resulting mixture was purified by RP-chromatography with a linear gradient of MeCN (0-50%) in 0.1% aq. TFA as the mobile phase, giving the *N*-((4-aminophenyl)sulfonyl)-4-nitrobenzamide **5c** as an orange amorphous powder after lyophilization (39 mg, 122  $\mu\text{mol}$ , 84%, 95% purity).  $^1\text{H}$  NMR (400 MHz, DMSO):  $\delta$  = 6.21 (bs, 1H), 6.63(d,  $J$  = 8.8 Hz, 1H), 7.64 (d,  $J$  = 8.8 Hz, 1H), 8.06 (d,  $J$  = 8.8 Hz, 1H), 8.29 (d,  $J$  = 8.8 Hz, 1H), 12.49 (bs, 1H) ppm.  $^{13}\text{C}$  NMR (100 MHz, DMSO):  $\delta$  = 112.3, 123.1, 123.6, 129.8, 130.2, 137.4, 149.8, 153.9, 163.7 ppm. HRMS (ESI)  $m/z$ :  $[\text{M}+\text{H}]^+$  Calcd for  $\text{C}_{13}\text{H}_{12}\text{N}_3\text{O}_5\text{S}$ : 322.0498; found 322.0511.

# <sup>1</sup>H and <sup>13</sup>C NMR Spectra (DMSO)

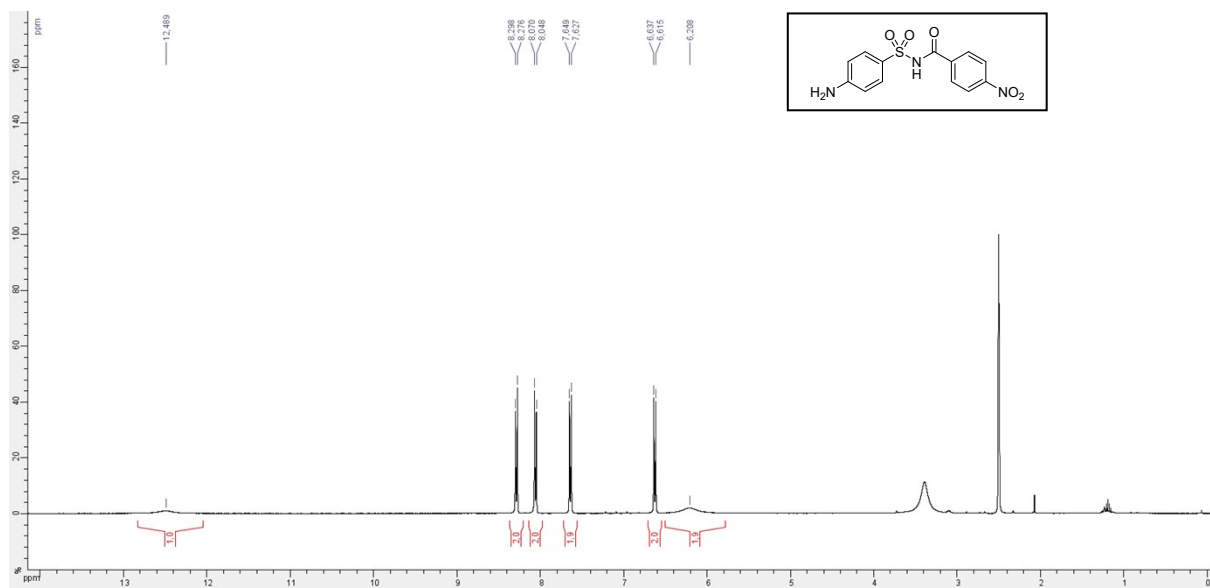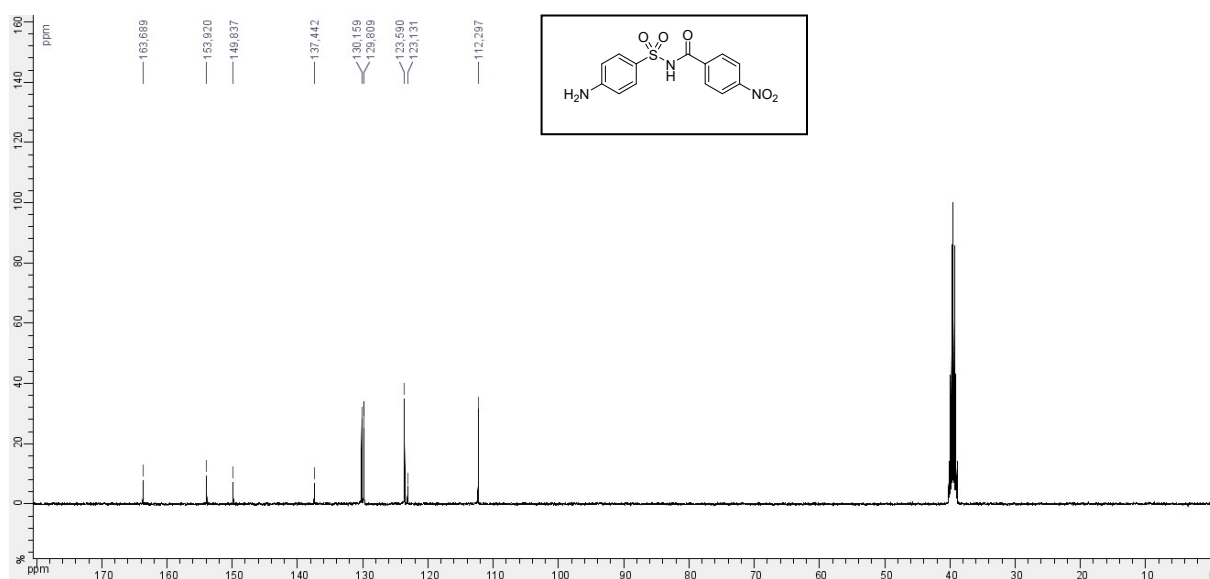

### ***N*-((4-aminophenyl)sulfonyl)-3-methoxy-4-nitrobenzamide (**5d**)**

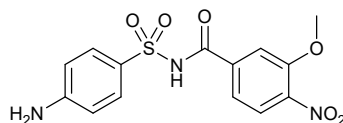

4-aminobenzenesulfonyl azide **2** (124 mg, 535  $\mu\text{mol}$ ) was dissolved in dry NMP (2.1 mL). Thereafter, triethylammonium 3-methoxy-4-nitrobenzothioate **3d** (112 mg, 356  $\mu\text{mol}$ ), water (700  $\mu\text{L}$ ) and  $\text{NaHCO}_3$  (90 mg, 1.07 mmol) were sequentially added. The resulting mixture was stirred at room temperature for 4 h. The reaction was checked for completion by RP-HPLC (system A). 0.1% aq. TFA (pH 2.0, 18 mL) was added and the resulting mixture was purified by RP-chromatography with a linear gradient of MeCN (0-50%) in 0.1% aq. TFA as the mobile phase, giving the *N*-((4-aminophenyl)sulfonyl)-3-methoxy-4-nitrobenzamide **5d** as a yellow amorphous powder after lyophilization (134 mg, 300  $\mu\text{mol}$ , 85%, 96% purity).  $^1\text{H}$  NMR (400 MHz, DMSO):  $\delta$  = 3.98 (s, 3H), 6.63-6.65 (m, 2H), 7.53-7.95 (m, 5H) ppm.  $^{13}\text{C}$  NMR (100 MHz, DMSO):  $\delta$  = 57.0, 112.4, 114.0, 120.5, 123.1, 124.9, 130.2, 136.4, 141.7, 151.4, 153.9, 163.3 ppm. HRMS (ESI)  $m/z$ :  $[\text{M}+\text{H}]^+$  Calcd for  $\text{C}_{14}\text{H}_{14}\text{N}_3\text{O}_6\text{S}$ : 352.0603; found 352.0618.

# <sup>1</sup>H and <sup>13</sup>C NMR Spectra (DMSO)

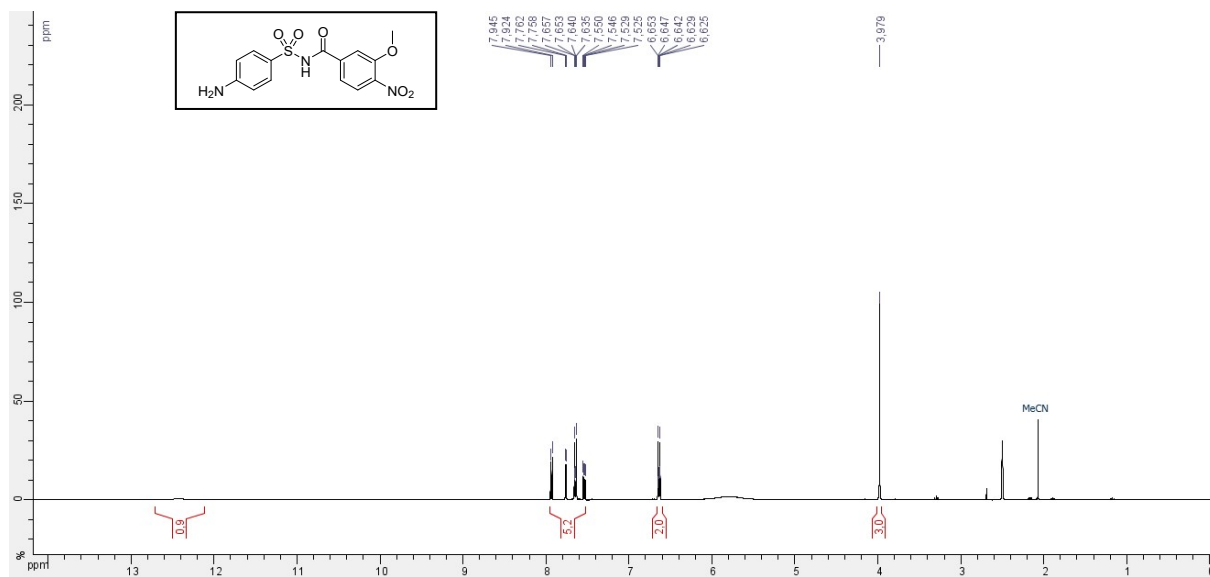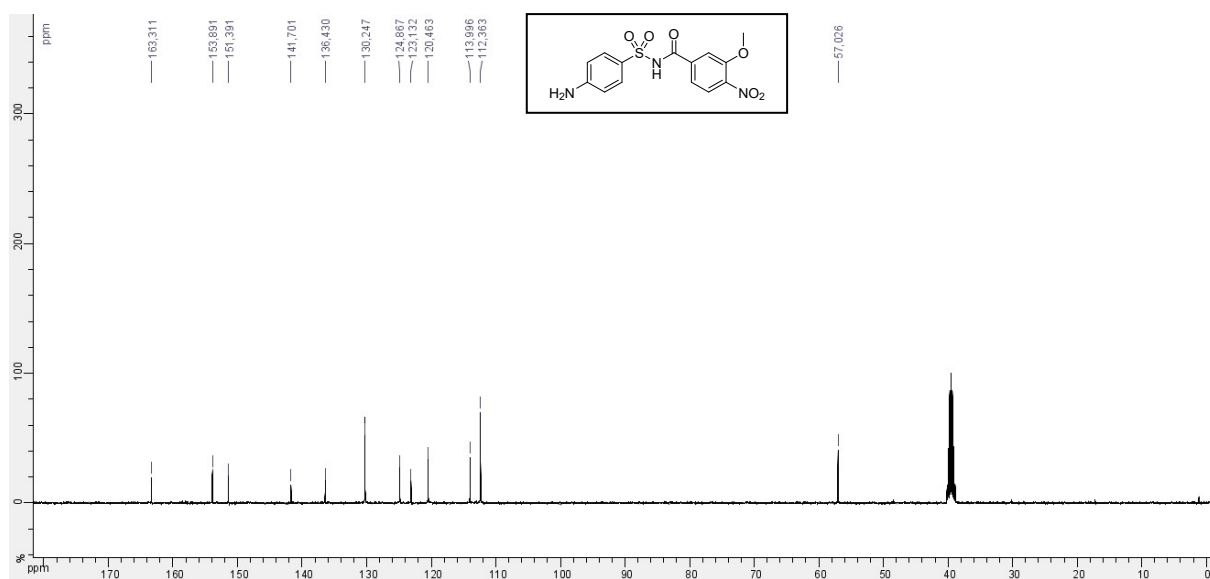

### ***N*-((4-aminophenyl)sulfonyl)-4-(trifluoromethyl)benzamide (**5e**)**

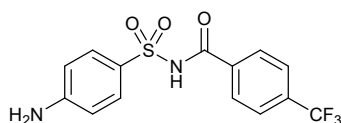

4-aminobenzenesulfonyl azide **2** (54 mg, 229  $\mu\text{mol}$ ) was dissolved in dry NMP (1.5 mL). Thereafter, triethylammonium 4-(trifluoromethyl)benzothioate **3e** (47 mg, 153  $\mu\text{mol}$ ), water (500  $\mu\text{L}$ ) and  $\text{NaHCO}_3$  (38 mg, 458  $\mu\text{mol}$ ) were sequentially added. The resulting mixture was stirred at room temperature for 4 h. The reaction was checked for completion by RP-HPLC (system A). 0.1% aq. TFA (pH 2.0, 15 mL) was added and the resulting mixture was purified by RP-chromatography with a linear gradient of MeCN (0-50%) in 0.1% aq. TFA as the mobile phase, giving the *N*-((4-aminophenyl)sulfonyl)-4-(trifluoromethyl)benzamide **5e** as a white amorphous powder after lyophilization (66 mg, 150  $\mu\text{mol}$ , quant. , 99% purity).  $^1\text{H}$  NMR (400 MHz, DMSO):  $\delta$  = 6.63-6.67 (m, 2H), 7.64-7.67 (m, 2H), 7.83-8.04 (m, 4H) ppm.  $^{13}\text{C}$  NMR (100 MHz, DMSO):  $\delta$  = 112.6, 123.6, 125.6 (q,  $J_{\text{C-F}}$  = 3.7 Hz), 129.2, 130.2, 132.5 (q,  $J_{\text{C-F}}$  = 32.1), 135.7, 153.7, 158.5 (q,  $J_{\text{C-F}}$  = 38.2), 164.2 ppm. HRMS (ESI)  $m/z$ :  $[\text{M}+\text{H}]^+$  Calcd for  $\text{C}_{14}\text{H}_{12}\text{F}_3\text{N}_2\text{O}_3\text{S}$ : 345.0515; found 345.0521.

# <sup>1</sup>H and <sup>13</sup>C NMR Spectra (DMSO)

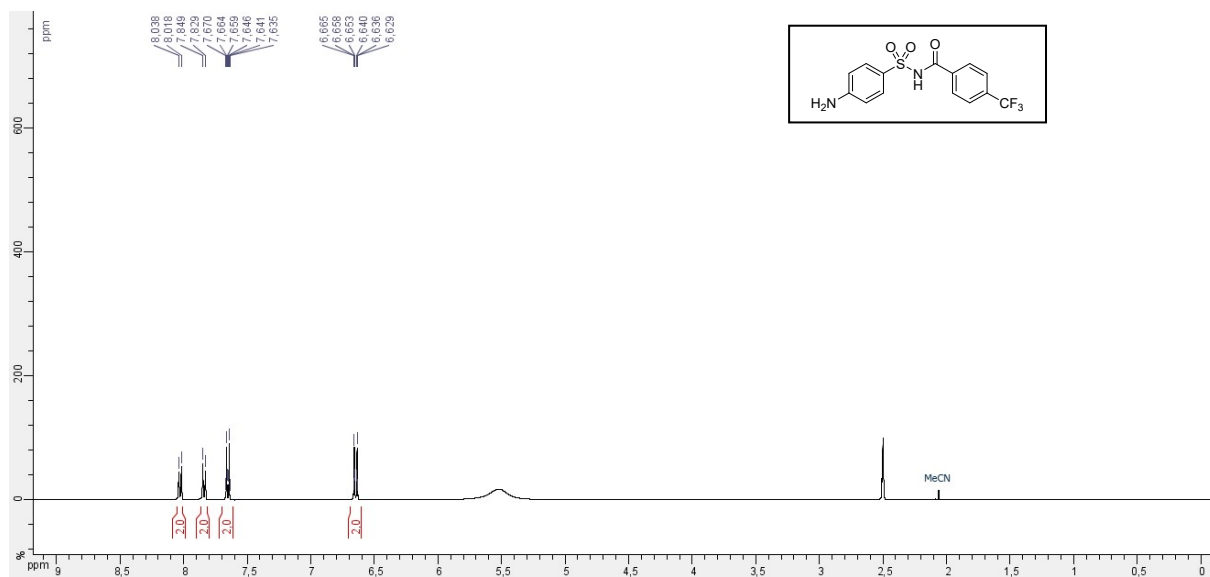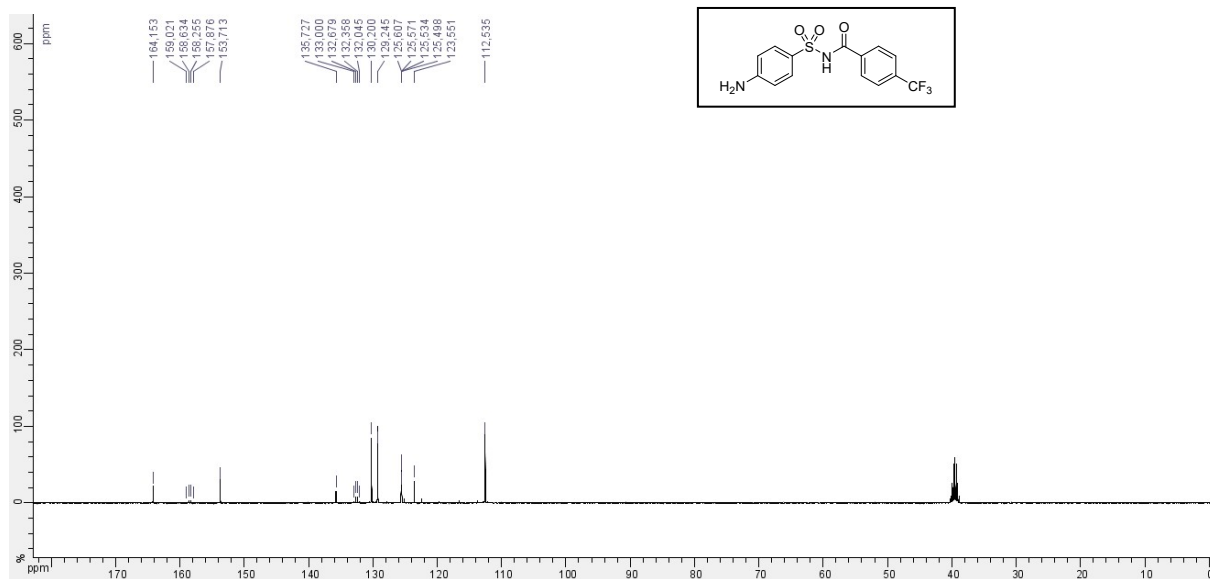

### ***N*-((4-aminophenyl)sulfonyl)-3,4,5-trifluorobenzamide (5f)**

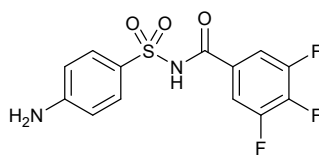

4-aminobenzenesulfonyl azide **2** (89 mg, 382  $\mu\text{mol}$ ) was dissolved in dry NMP (2 mL). Thereafter, triethylammonium 3,4,5-trifluorobenzothioate **3f** (75 mg, 256  $\mu\text{mol}$ ), water (650  $\mu\text{L}$ ) and  $\text{NaHCO}_3$  (65 mg, 768  $\mu\text{mol}$ ) were sequentially added. The resulting mixture was stirred at room temperature for 4 h. The reaction was checked for completion by RP-HPLC (system A). 0.1% aq. TFA (pH 2.0, 18 mL) was added and the resulting mixture was purified by RP-chromatography with a linear gradient of MeCN (0-50%) in 0.1% aq. TFA as the mobile phase, giving the *N*-((4-aminophenyl)sulfonyl)-3,4,5-trifluorobenzamide **5f** as a white amorphous powder after lyophilization (86 mg, 202  $\mu\text{mol}$ , 82%, 99% purity).  $^1\text{H}$  NMR (400 MHz, DMSO):  $\delta$  = 6.60-6.64 (m, 2H), 7.60-7.64 (m, 2H), 7.80-7.88 (m, 2H) ppm.  $^{13}\text{C}$  NMR (100 MHz, DMSO):  $\delta$  = 112.4, 113.5-113.8 (m), 123.1, 128.0-128.2 (m), 130.3, 141.9 (dt,  $J_{1\text{C-F}} = 255$  Hz,  $J_{2\text{C-F}} = 15.4$  Hz), 150.1 (ddd,  $J_{1\text{C-F}} = 249$  Hz,  $J_{2\text{C-F}} = 10.2$  Hz,  $J_{3\text{C-F}} = 2.9$  Hz), 154.0, 162.0 ppm. HRMS (ESI)  $m/z$ :  $[\text{M}+\text{H}]^+$  Calcd for  $\text{C}_{13}\text{H}_{10}\text{F}_3\text{N}_2\text{O}_3\text{S}$ : 331.0359; found 331.0365.



# <sup>1</sup>H and <sup>13</sup>C NMR Spectra (DMSO)

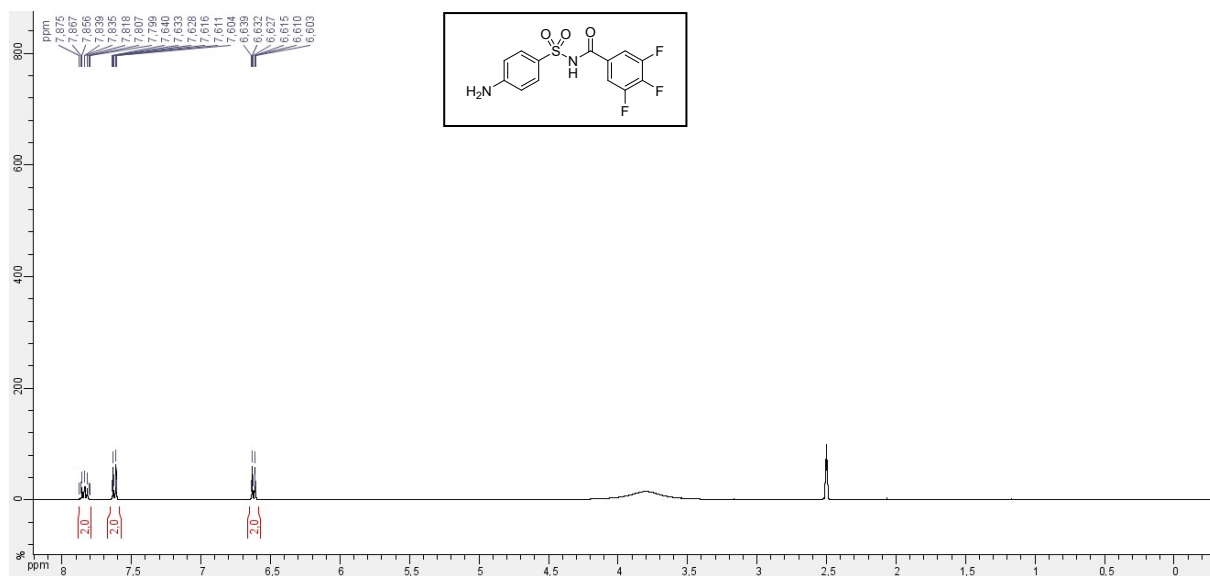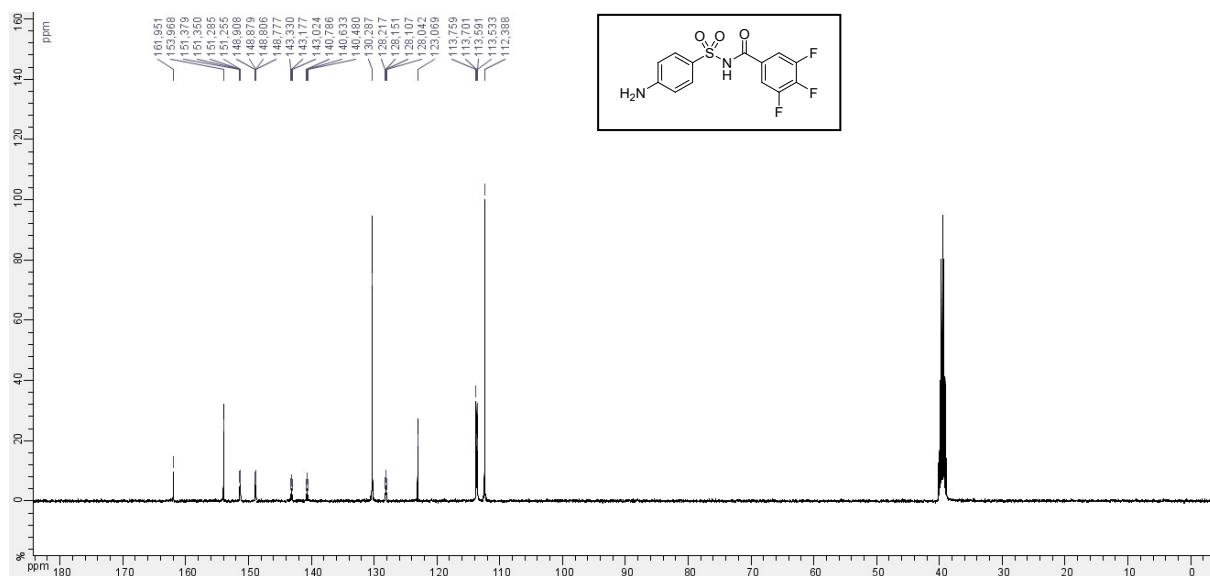

### ***N*-((4-aminophenyl)sulfonyl)-2,4-dichlorobenzamide (5g)**

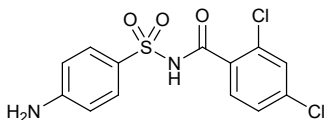

4-aminobenzenesulfonyl azide **2** (69 mg, 291  $\mu\text{mol}$ ) was dissolved in dry NMP (4.5 mL). Thereafter, triethylammonium 2,4-dichlorobenzothioate **3g** (60 mg, 195  $\mu\text{mol}$ ), water (1.5 mL) and  $\text{NaHCO}_3$  (49 mg, 582  $\mu\text{mol}$ ) were sequentially added. The resulting mixture was stirred at room temperature for 4 h. The reaction was checked for completion by RP-HPLC (system A). 0.1% aq. TFA (pH 2.0, 50 mL) was added and the resulting mixture was purified by RP-chromatography with a linear gradient of MeCN (0-50%) in 0.1% aq. TFA as the mobile phase, giving the *N*-((4-aminophenyl)sulfonyl)-2,4-dichlorobenzamide **5g** as a white amorphous powder after lyophilization (62 mg, 140  $\mu\text{mol}$ , 72%, 95% purity).  $^1\text{H}$  NMR (500 MHz, DMSO):  $\delta$  = 6.63-7.69 (m, 7H), 12.33 (bs, 1H) ppm.  $^{13}\text{C}$  NMR (125 MHz, DMSO):  $\delta$  = 112.4, 123.1, 127.5, 129.4, 130.0, 130.4, 131.3, 133.0, 135.8, 153.9, 163.7 ppm. HRMS (ESI)  $m/z$ :  $[\text{M}+\text{H}]^+$  Calcd for  $\text{C}_{13}\text{H}_{11}\text{Cl}_2\text{N}_2\text{O}_3\text{S}$ : 344.9862; found 344.9858.

# <sup>1</sup>H and <sup>13</sup>C NMR Spectra (DMSO)

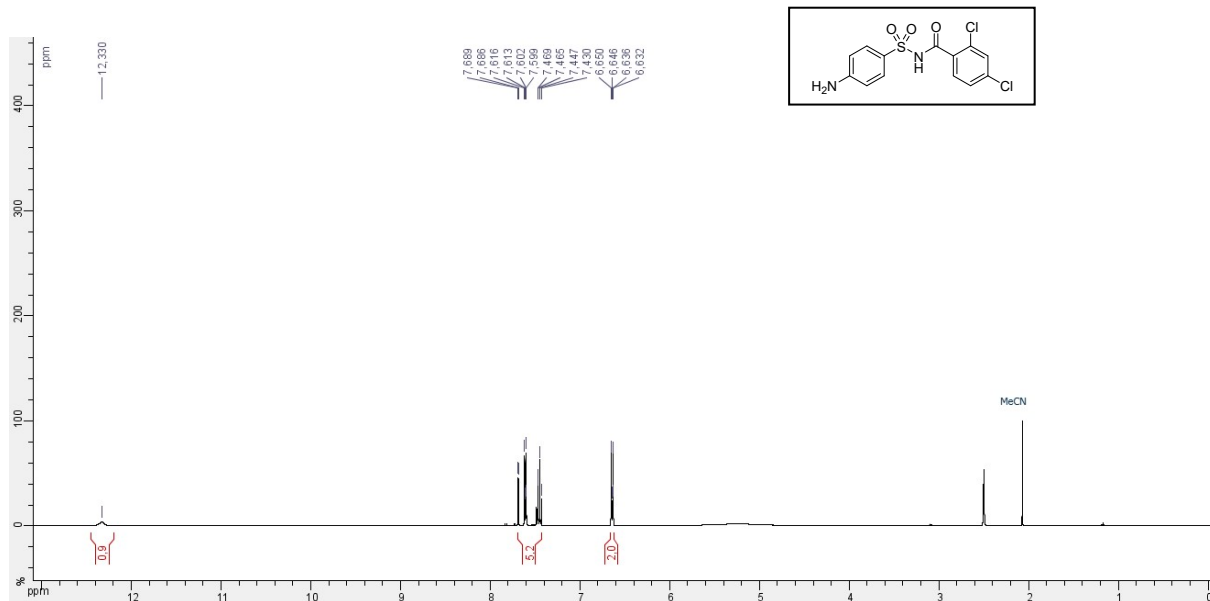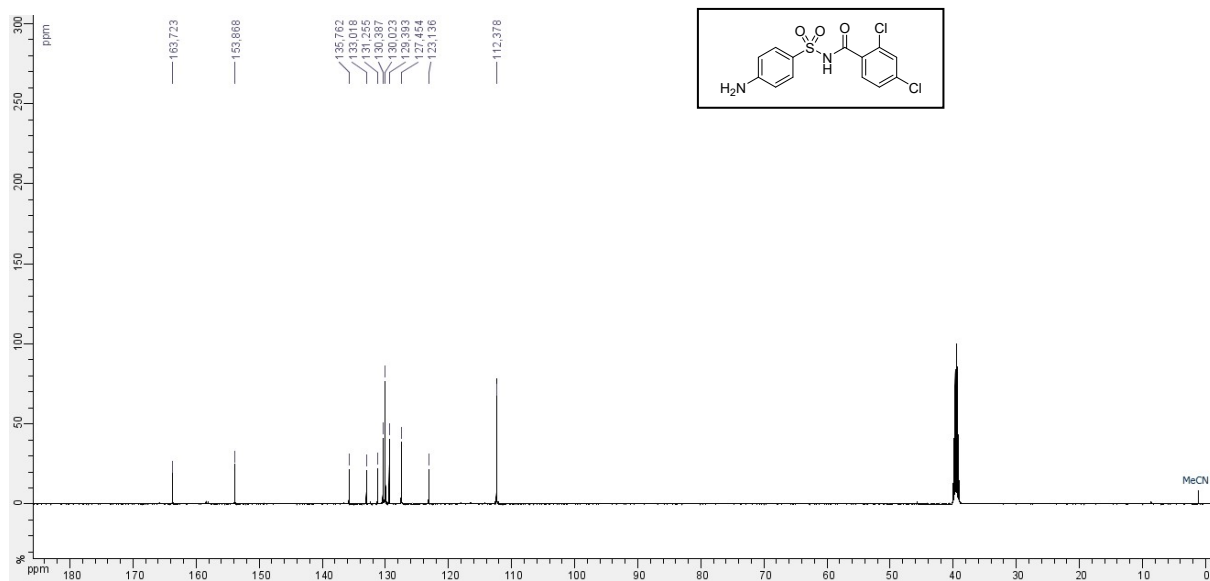

### ***N*-((4-aminophenyl)sulfonyl)benzamide (**5h**)**

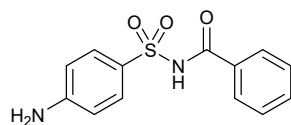

4-aminobenzenesulfonyl azide **2** (120 mg, 530  $\mu\text{mol}$ ) was dissolved in dry MeCN (12 mL). Thereafter, thiobenzoic acid **3h** (93  $\mu\text{L}$ , 795  $\mu\text{mol}$ ), water (4 mL) and  $\text{NaHCO}_3$  (134 mg, 1.6 mmol) were sequentially added. The resulting mixture was stirred at room temperature for 16 h. The reaction was checked for completion by TLC (DCM-MeOH, 96 : 4, v/v) and evaporated to dryness. The resulting residue was purified by chromatography on a silica gel column with a linear gradient of MeOH (0-10%) in DCM as the mobile phase, giving *N*-((4-aminophenyl)sulfonyl)benzamide **5h** as a white powder (108 mg, 390  $\mu\text{mol}$ , 74%, 98% purity).  $^1\text{H}$  NMR (500 MHz, DMSO):  $\delta$  = 6.16 (bs, 2H), 6.16-8.84 (m, 9H), 12.08 (bs, 1H) ppm.  $^{13}\text{C}$  NMR (125 MHz, DMSO):  $\delta$  = 112.3, 123.7, 128.2, 128.5, 130.1, 131.9, 133.0, 153.7, 165.1, 206.6 ppm. HRMS (ESI)  $m/z$ :  $[\text{M-H}]^-$  Calcd for  $\text{C}_{13}\text{H}_{13}\text{N}_2\text{O}_3\text{S}$ : 277.0647; found 277.0664.

# <sup>1</sup>H and <sup>13</sup>C NMR Spectra (DMSO)

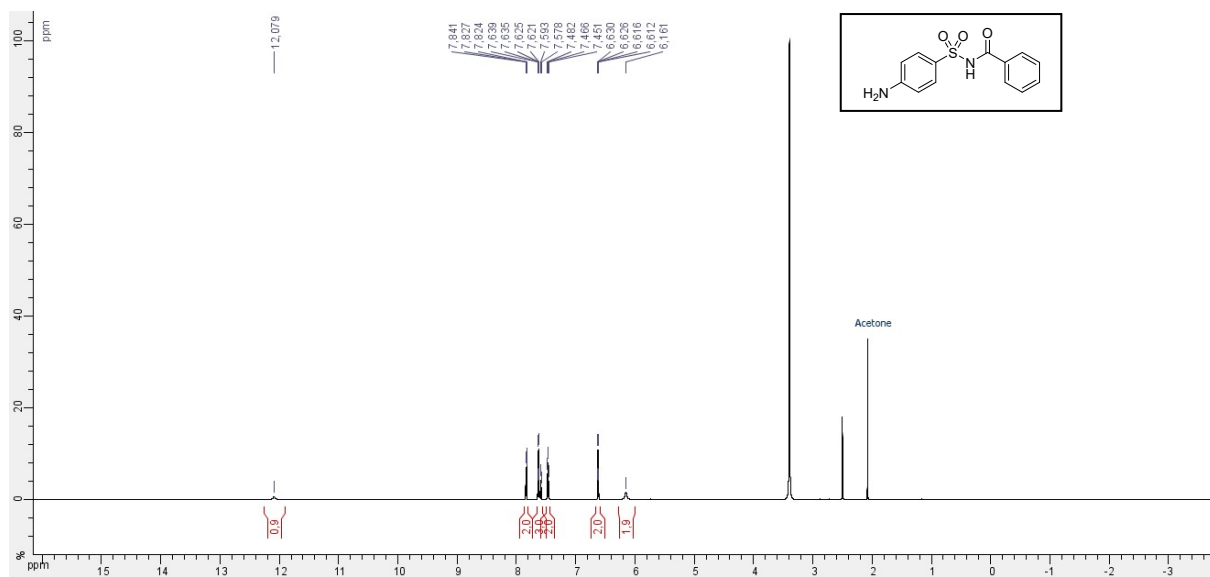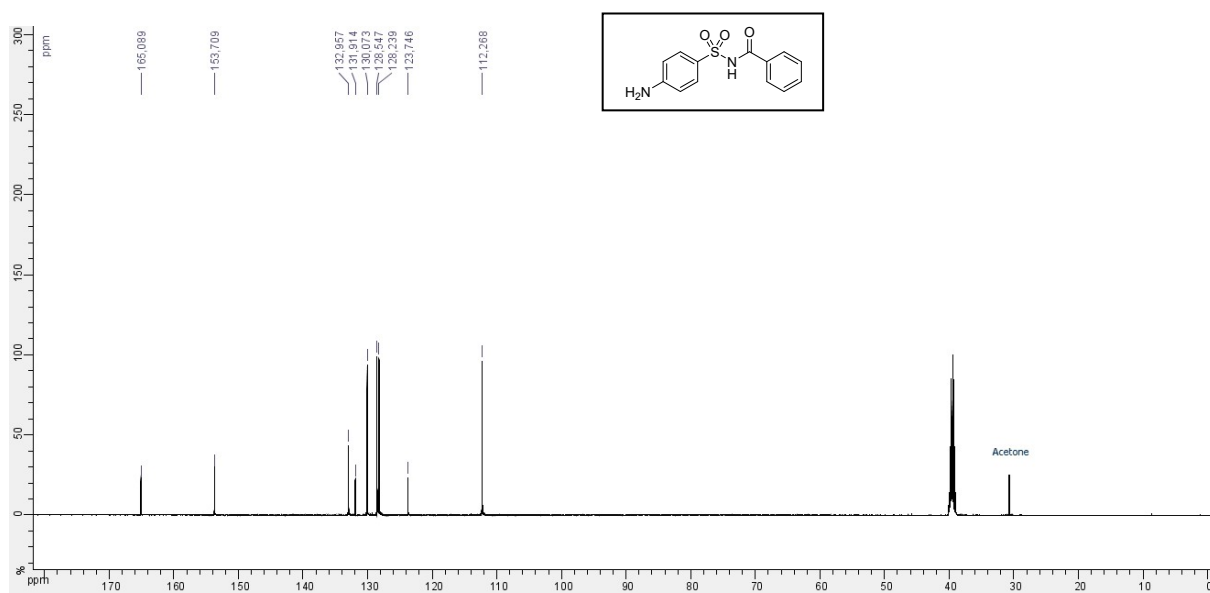

### **N-((4-aminophenyl)sulfonyl)acetamide (5i)**

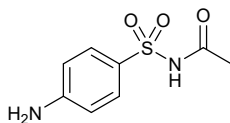

4-aminobenzenesulfonyl azide **2** (24 mg, 106  $\mu\text{mol}$ ) was dissolved in dry MeCN (1.5 mL). Thereafter, potassium thioacetate **3i** (18 mg, 160  $\mu\text{mol}$ ), water (500  $\mu\text{L}$ ) and  $\text{NaHCO}_3$  (18 mg, 212  $\mu\text{mol}$ ) were sequentially added. The resulting mixture was stirred at room temperature for 16 h. The reaction was checked for completion by TLC (DCM-MeOH, 96 : 4, v/v) and evaporated to dryness. The resulting residue was purified by chromatography on a silica gel column with a linear gradient of MeOH (0-10%) in DCM as the mobile phase, giving N-((4-aminophenyl)sulfonyl)acetamide **5i** as a white powder (20 mg, 47  $\mu\text{mol}$ , 90%, 99% purity).  $^1\text{H}$  NMR (400 MHz, MeOD):  $\delta$  = 1.94 (s, 3H), 6.65-7.66 (m, 4H) ppm.  $^{13}\text{C}$  NMR (100 MHz, MeOD):  $\delta$  = 23.3, 113.9, 125.9, 131.3, 155.2, 171.0 ppm. HRMS (ESI)  $m/z$ :  $[\text{M}+\text{H}]^+$  Calcd for  $\text{C}_8\text{H}_{11}\text{N}_2\text{O}_3\text{S}$ : 215.0485; found 215.0488.

# <sup>1</sup>H and <sup>13</sup>C NMR Spectra (MeOD)

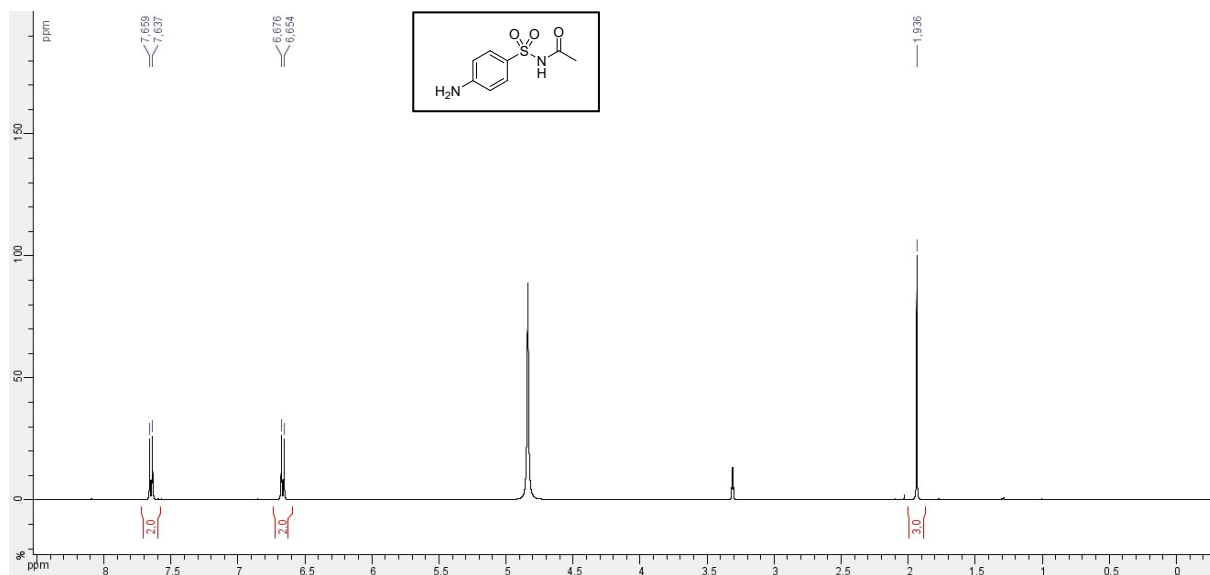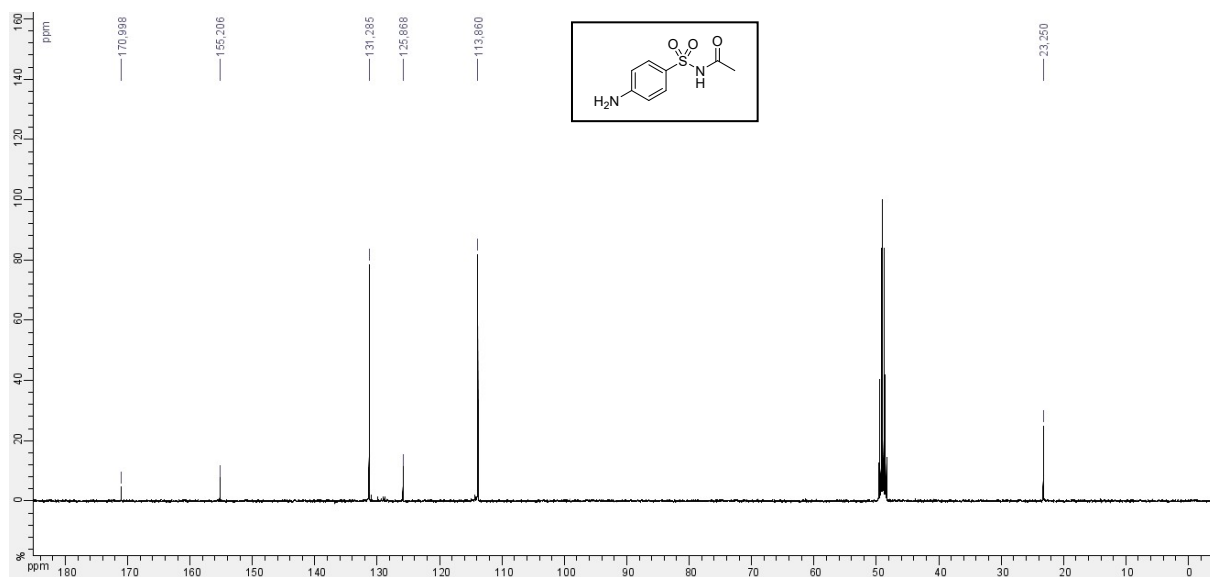

## **Antibacterial and antibiofilm activities of *N*-acylsulfonamide analogues**

### **Determination of minimum inhibitory concentration (MIC)**

All synthesized *N*-acylsulfonamide derivative analogues were evaluated to determine their minimum inhibitory concentrations (MICs) against representative Gram-negative (*Escherichia coli* ATCC 8739 and *Pseudomonas aeruginosa* ATCC 27853) and Gram-positive (*Bacillus subtilis* ATCC 6051 and *Staphylococcus aureus* CIP 107093) bacterial pathogens according to CLSI guidelines using broth microdilution method.<sup>3</sup> Briefly, *N*-acylsulfonamide derivative analogues were dissolved in DMSO (Sigma-Aldrich-D8418) at 25.6 mg mL<sup>-1</sup> and diluted in cation-adjusted Mueller Hinton broth (BD Difco™-212322) adjusted to pH 7.4 (±0.2) to obtain concentration ranging from 1 to 256 µg mL<sup>-1</sup>. Sulfacetamide was used as a reference drug. The inoculum with the test culture to give a final concentration of 5 × 10<sup>5</sup> CFU mL<sup>-1</sup> was used. The MIC values were determined after 24 h of incubation at 37°C without shaking. After incubation, resazurin (Acros-organics- 418900050) at 0.015% was added to all wells (50 µL per well), and further incubated for 2–4 h for the observation of colour change. On completion of the incubation, wells with no colour change (blue resazurin color remained unchanged) were scored as above the MIC value.

### **Biofilm quantification using a crystal violet assay**

To assess the propensity of *E. coli* ATCC 8739 and *P. aeruginosa* ATCC 27853 strains to form biofilms in the presence of *N*-acylsulfonamide derivative analogues (5a, 5b, 5h and 5i) at a ½ MIC, we performed crystal-violet staining assays as described by O'Toole.<sup>4</sup> Briefly, overnight cultures were inoculated into a fresh LB broth and grown at 37 °C for 24 h in a 96-well microtiter plate under static conditions. Cell growth was determined at 580 nm. The biofilm was measured by discarding the medium, rinsing the wells with distilled water and staining any bound cells with 0.1% crystal violet (Sigma-Aldrich-V5265). The dye was dissolved in 30% (v/v) acetic acid (Supelco-1.00063.1011) and optical density was determined at 595 nm using the Spark 20M multimode microplate reader controlled by SparkControl™ software Version



2.1 (Tecan Group Ltd., Männedorf, Switzerland). In each experiment, the background staining was adjusted by subtracting the crystal violet bound to uninoculated controls.

### **Statistical Analyses**

To assess the significance of the differences between groups, ordinary one-way ANOVA followed by Dunnett multiple-comparison test were performed to calculate the *P* values using Prism GraphPad (GraphPad, San Diego, CA, USA). All experiments were conducted independently with at least three replicates. The results were displayed as the mean  $\pm$  standard error of the mean. Asterisks indicate values that are significantly different as follows: \*, *P*<0.05 ; \*\*, *P*<0.01 ; \*\*\*, *P*<0.001 ; \*\*\*\*, *P*<0.0001 ; ns, not significantly different.

### **Cytotoxicity assays**

The potential cytotoxicity of *N*-acylsulfonamide derivative analogues (**5a**, **5b**, **5h** and **5i**) at a MIC and ½ MIC was determined by measurement of the lactate dehydrogenase (LDH) release by HaCaT and Caco 2 cell lines. Cells were grown at 37 °C in 5% CO<sub>2</sub> atmosphere in Dubelcco's modified Eagle medium (DMEM, Gibco, Thermo Scientific) with 10% of fetal calf serum (FCS, Biowest, VWR, Fontenay-sous-bois, France) for HaCaT cells and 20% of FCS for Caco 2 cells and 1% of antibiotics cocktail (penicillin–streptomycin, Corning, USA) for both. Cells were then seeded in 24-well plates (Nunc, Thermo Scientific). They were grown 72h before use. Cells were rinsed with phosphate buffer saline (PBS, Corning, USA) and incubated for 24h with the compounds which were diluted in fresh DMEM. LDH release was measured using the Invitrogen CyQuant LDH cytotoxicity assay.

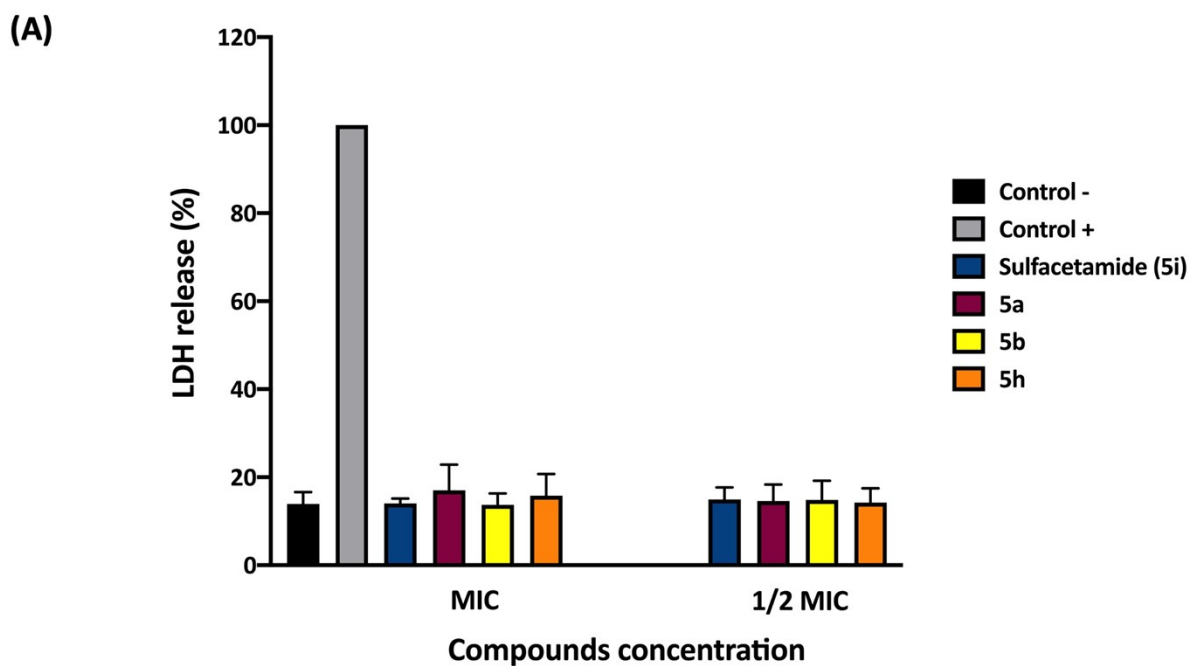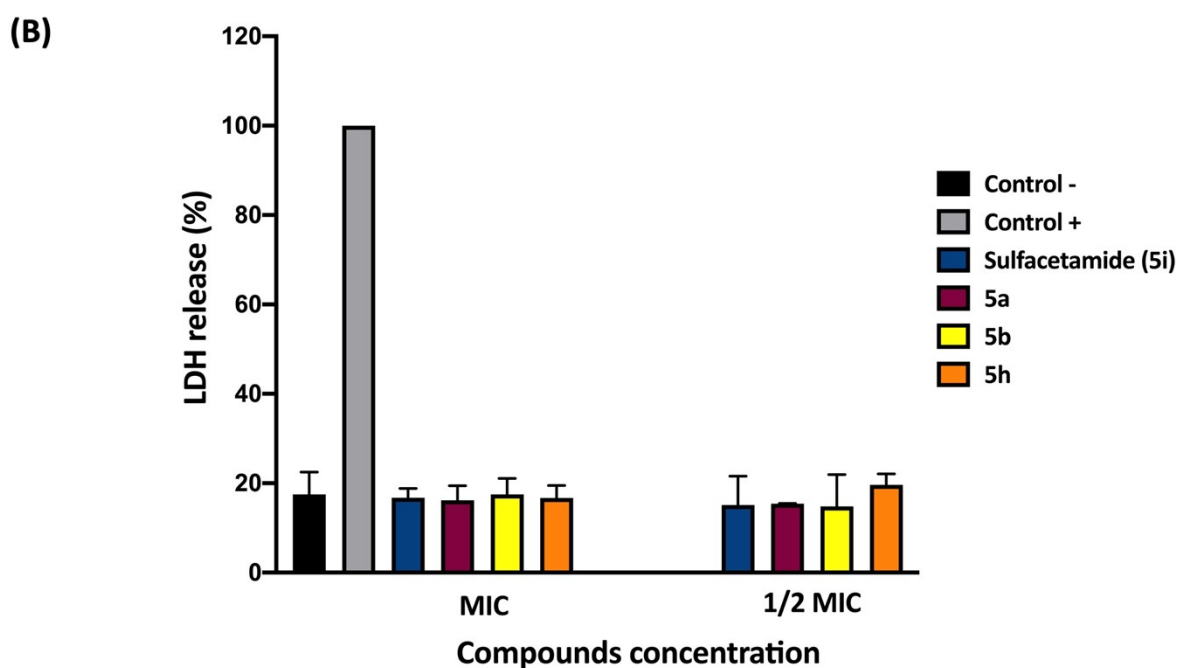

**Fig. S1** Cytotoxicity of compounds **5a**, **5b**, **5h** and **5i** against HaCaT **(A)** and Caco-2 **(B)** cell lines. Control -, untreated cells; control +, damaged cells. The results were displayed as the mean  $\pm$  standard error of the mean of two biological independent assays with at least 2 replicates.

## **Bibliography**

1. H. E. Gottlieb, V. Kotlyar and A. Nudelman, *J. Org. Chem.*, 1997, **62**, 7512-7515.
2. M. J. Gattner, M. Ehrlich and M. Vrabel, *Chem. Commun.*, 2014, **50**, 12568-12571.
3. M. A. Wikler, *Methods for dilution antimicrobial susceptibility tests for bacteria that grow aerobically: approved standard*, 2006.
4. G. A. O'Toole and R. Kolter, *Mol. Microbiol.*, 1998, **28**, 449-461.
